1 Annual prevalence of non-communicable diseases and identification of vulnerable  
2 populations following the Fukushima disaster and COVID-19 pandemic

3

4 Michio Murakami<sup>a,\*</sup> and Shuhei Nomura<sup>b,c,d</sup>

5

6 <sup>a</sup> Center for Infectious Disease Education and Research, Osaka University, Osaka, Japan

7 <sup>b</sup> Department of Health Policy and Management, School of Medicine, Keio University, Tokyo, Japan

8 <sup>c</sup> Department of Global Health Policy, Graduate School of Medicine, The University of Tokyo, Tokyo,

9 Japan

10 <sup>d</sup> Tokyo Foundation for Policy Research, Tokyo, Japan

11

12 \* Corresponding author

13

14 **Highlights**

- 15 ● We assessed secondary health effects of Fukushima disaster and COVID-19 pandemic
- 16 ● Non-communicable diseases increased after the disaster and COVID-19 pandemic
- 17 ● The increase rates were higher among females aged 40–74 years after the disaster
- 18 ● The increase rates were higher among males aged 0–39 years after COVID-19 pandemic
- 19 ● It is important to provide tailor-made public health support among populations

NOTE: This preprint reports new research that has not been certified by peer review and should not be used to guide clinical practice.

20

21 **Abstract**

22 Disasters, pandemics, and their response measures can have secondary effects on the physical and  
23 psychological health of affected populations. Identifying populations vulnerable to these effects is  
24 beneficial for promoting effective health and prevention strategies. Using health insurance receipt  
25 data from 2009 to 2020, we assessed changes in prevalence of major non-communicable diseases  
26 (NCDs), including hypertension, hyperlipidemia, diabetes, and mental disorders, among affected  
27 populations before and after the Fukushima disaster and coronavirus disease (COVID-19) outbreak  
28 in Japan. Furthermore, age and sex groups with the largest increases in prevalence after these events  
29 were identified. The participants of this study were members of the Employees' Health Insurance  
30 scheme, including employees of companies and their dependent family members. The dataset was  
31 provided by JMDC Inc. The annual age-adjusted prevalence of each disease was used to calculate the  
32 ratio of disease prevalence before and after the events. After the Fukushima disaster, hypertension,  
33 hyperlipidemia, and diabetes generally increased over a 9-year period in Fukushima Prefecture. The  
34 increase in the prevalence rate of these three NCDs and mental disorders were the highest among  
35 females aged 40–74 years compared to males and the other age groups. The prevalence of all four  
36 diseases increased after the COVID-19 outbreak in Japan, with marked increase in males aged 0–39  
37 years. Populations that have experienced secondary health effects such as NCDs are unique to each  
38 disaster or pandemic, and it is important to provide tailor-made public health support among

39 populations in accordance to the type of disasters and pandemic.

40

41 Keywords

42 COVID-19; Diabetes mellitus; Fukushima nuclear accident; Hyperlipidemias; Hypertension; Mental

43 disorders

44

## 45 **1. Introduction**

46 Disasters, pandemics, and their countermeasures impact the lives of affected people with secondary

47 effects on their physical and psychological health. Major non-communicable diseases (NCDs), such

48 as hypertension, hyperlipidemia, diabetes, and mental disorders, have been reported to increase

49 among people who have experienced natural or man-made disasters, such as the Chornobyl nuclear

50 power plant accident in 1986 and Hurricane Katrina in 2005 [1, 2]. Several studies have also revealed

51 that the Great East Japan Earthquake and the Fukushima Daiichi Nuclear Power Station accident in

52 March 2011 (hereafter referred to as the “Fukushima disaster”) also caused an increase in NCDs

53 among residents who evacuated for short to long periods [3-5]. In addition, long-term deterioration

54 of mental health, including increases in psychological distress and suicide rates, has been observed,

55 especially among residents affected by the Fukushima disaster, although there is a trend toward

56 improvement over time [6, 7]. Furthermore, in Minamisoma City, located within 10–40 km of the

57 nuclear power station, a significant increase in the age-adjusted prevalence of diabetes was observed

58 among both those who did not evacuate and those who did, during a 7-year period following the  
59 disaster [8]. High psychological distress has also been reported among non-evacuees in host  
60 communities where evacuees were accommodated [9]. Changes in living conditions due to evacuation  
61 after a disaster as well as various socioeconomic changes in the surrounding communities may cause  
62 secondary physical and psychological health effects to evacuees and non-evacuees. However, the  
63 spatial and temporal extent of post-disaster secondary health effects have not been established, as  
64 there are only a limited number of long-term studies on both evacuees and non-evacuees over a wide  
65 area.

66 Following the emergence and worldwide spread of coronavirus disease (COVID-19), behavioral  
67 restrictions such as lockdowns or stay-at-home measures, have been implemented in various countries,  
68 including Japan, to curb infection spread. During the pandemic, some studies have shown  
69 improvement in lifestyle, dietary, and drinking behaviors [10-12]; however, increases in body weight  
70 and worsening of metabolic biomarkers, such as glycemic values, among specific populations have  
71 also been reported [13, 14]. Furthermore, there has been a significant increase in mental disorders  
72 among the global population, especially in females and younger age groups [15]. Similarities and  
73 differences in secondary health effects among multiple disasters and pandemics remain unclear due  
74 to limited analyses of data obtained before and after such events. Furthermore, identifying the age  
75 and sex groups in which NCDs occurred can provide beneficial information to promote effective  
76 support for vulnerable populations regarding the secondary health effects following disasters and

77 pandemics.

78 We used health insurance receipt data to assess changes in the prevalence of hypertension,  
79 hyperlipidemia, diabetes, and mental disorders in the population affected by the Fukushima disaster  
80 and COVID-19 in Japan. First, we investigated how the prevalence of these diseases changed over 9  
81 years from January 2009 to December 2020 following the Fukushima disaster. The Fukushima,  
82 neighboring prefectures of Iwate, and Miyagi prefectures, as well as the whole of Japan, and three  
83 major regions within Fukushima Prefecture were considered to assess the wide-area secondary health  
84 effects caused by the disaster. We then analyzed the prevalence of these diseases in the Japan and  
85 Fukushima Prefecture by age and sex to identify the populations that were the most significantly  
86 affected. Next, we examined the annual changes in the prevalence of these diseases across Japan  
87 before and after the COVID-19 outbreak and identified the most significantly affected age and sex  
88 groups. We then analyzed the associations between population density or COVID-19 infection rates  
89 and changes in the prevalence of these diseases by prefecture to determine prefectural characteristics  
90 that are susceptible to these secondary health effects.

91

## 92 **2. Methods**

### 93 **2.1. Ethics**

94 This study was approved by the Osaka University Research Ethics Committee (approval number  
95 Ci21002).

96

## 97 **2.2. Fukushima disaster**

98 The reported number of people directly killed or missing due to the Great East Japan Earthquake and  
99 Tsunami (GJET) on March 11, 2011 was 18,423 (at the end of February 2022 [16]). The reported  
100 number of disaster-related deaths caused indirectly by the GJET (i.e., secondary victims) was 3,784  
101 (at the end of September 2021) [17]. Of the 18,423 people, 5,785 people in Iwate Prefecture, 10,757  
102 in Miyagi Prefecture, and 1,810 in Fukushima Prefecture were killed or missing. There were 470  
103 disaster-related deaths in Iwate Prefecture, 929 in Miyagi Prefecture, and 2,329 in Fukushima  
104 Prefecture. The number of people living in evacuation shelters immediately after the GJET was  
105 estimated to be more than 450,000 nationwide, including more than 400,000 in the Iwate, Miyagi,  
106 and Fukushima prefectures [18].

107 Following the Fukushima disaster, mandatory evacuation orders were issued to residents within a 20-  
108 km radius around the Fukushima Daiichi Nuclear Power Station and a 10-km radius around the Daini  
109 Nuclear Power Station on March 12, 2011, followed by evacuation orders on April 22, 2011 for areas  
110 where an additional exposure level would reach 20 mSv/y. Evacuation orders were issued for Hirono  
111 Town, Naraha Town, Tomioka Town, Kawauchi Village, Okuma Town, Futaba Town, Namie Town,  
112 Katsurao Village, Iitate Village, Minamisoma City, Tamura City, Kawamata Town, and the hotspot  
113 areas in Date City. Of these, Tamura City, Kawamata City, and Date City are in Nakadori (central  
114 area), whereas the other municipalities are located in Hamadori (coastal area). It was estimated that

115 more than 140,000 people were evacuated from these radius [19]. The affected people were evacuated  
116 to municipalities in Fukushima Prefecture outside the evacuation areas, such as Iwaki City  
117 (Hamadori), as well as to areas outside Fukushima Prefecture.

118 In 2012, the evacuation order was lifted in Kawauchi Village and Hirono Town, where the evacuation  
119 was decided by each municipality soon after the disaster. Furthermore, since 2014, the government  
120 has gradually lifted the evacuation order, and by the end of 2019, the evacuation order was lifted for  
121 the following municipalities: Tamura City, Kawauchi Village, Naraha Town, Katsurao Village,  
122 Minamisoma City, Iitate Village, Kawamata Town, Namie Town, Tomioka Town, and Okuma Town,  
123 excluding the difficult-to-return areas where radiation levels remain high located around the  
124 Fukushima Daiichi Nuclear Power Station.

125

### 126 **2.3 COVID-19**

127 The World Health Organization (WHO) declared COVID-19 a pandemic on March 11, 2020 [20]. In  
128 Japan, a declaration of the state of emergency was issued in seven prefectures on April 7, 2020 and  
129 extended to all prefectures on April 16, 2020. The state of emergency included requests to stay at  
130 home, instruction for schools to close temporarily, closure of businesses and stores that are not  
131 essential to daily life, and cancellation or postponement of events and exhibitions, but they were not  
132 mandatory. The state of emergency ended in 39 prefectures on May 14, 2020, in three more  
133 prefectures on May 21, 2020, and in all prefectures on May 25, 2020. This was the only emergency

134 declaration for 2020, and the reported number of COVID-19 positive cases in Japan in 2020 was  
135 234,109 [21].

136

#### 137 **2.4. Datasets and target population**

138 In this study, we used health insurance receipt data provided by JMDC Inc. The target population  
139 covered in the JMDC data were employees of companies and their dependent family members who  
140 belonged to Employees' Health Insurance (EHI) scheme (29 million people nationwide as of 2016),  
141 of which the JMDC covered 9 million of the population (as of 2022). JMDC Inc. contracts various  
142 health insurers under the EHI scheme across Japan to collect insurance claims, containing completely  
143 anonymized receipt information. Japan's insurance system is divided into three main schemes, and  
144 all persons, regardless of citizenship, who have been recognized as having resided in Japan for more  
145 than three months are obliged to join one of them. In addition to the EHI scheme, which is the focus  
146 of this study, the insurance system includes National Health Insurance (NHI), which targets  
147 individuals who do not belong to the EHI scheme, including farmers, freelancers, non-regular  
148 employees, retired company employees, etc., and long-term care insurance (LTCI), which includes  
149 individuals aged 75 and above.

150 We used data on the annual number of patients for each targeted disease and other diseases (i.e., all  
151 patients visiting the medical institution regardless of their diagnosis) and the estimated prevalence by  
152 age and sex groups in each prefecture or municipality from January 2009 to December 2020. The



153 prefectures and municipalities were based on the location of the medical institution. The target  
154 diseases included hypertension, hyperlipidemia, diabetes, and mental disorders, based on the ICD 10  
155 classification: I10-I15, E78, E10-E14, and F00-F99, respectively. The diseases were diagnosed by a  
156 physician, with no distinction made between primary and secondary diseases. The total number of  
157 patients in the JMDC database for hypertension, hyperlipidemia, diabetes, mental disorders, and other  
158 disease in Japan from 2009 to 2020 is provided in Table S1.

159 The prevalence ( $P_{d,t,r,a,s}$ ) of the target disease ( $d$ ) in each prefecture or municipality ( $r$ ) by age ( $a$ :0–  
160 19, 20–39, 40–64, and 65–74 years) and sex ( $s$ ) groups for each year ( $t$ ) were calculated according to  
161 eqs.1 and 2.

162

$$163 \quad P_{d,t,r,a,s} = \frac{A_{d,t,r,a,s}}{B_{t,r,a,s}} \times \frac{C_{d,t,a,s}}{\sum_r D_{d,t,r,a,s}} \quad (\text{eq.1})$$

$$164 \quad D_{d,t,r,a,s} = \frac{A_{d,t,r,a,s}}{B_{t,r,a,s}} \times E_{t,r,a,s} \quad (\text{eq.2})$$

165 Where  $A_{d,t,r,a,s}$  is the actual number of patients with the target disease by each prefecture or  
166 municipality among the target age and sex population in the target year,  $B_{t,r,a,s}$  is the actual number of  
167 patients who visited the medical institution regardless of their diagnosis in each prefecture or  
168 municipality among the target age and sex population in the target year,  $C_{d,t,a,s}$  is the estimated number  
169 of patients nationwide among the target age and sex population in the target year and was estimated  
170 by multiplying the prevalence of each disease (the ratio of the number of patients to the number of

171 people in the mother population covered by JMDC Inc.) by age (1-year interval) and sex groups and  
172 by the national population,  $D_{d,t,r,a,s}$  is the estimated number of patients with the target disease in each  
173 prefecture and municipality in the target age and sex population in the target year, and  $E_{t,r,a,s}$  is the  
174 number of people in each prefecture and municipality in the target age and sex population in the target  
175 year.

176

177 The Basic Resident Register data was used for to determine the number of people in the prefectures  
178 for each year [22]. For the municipal population data, the national census performed in 2010, 2015,  
179 and 2020 was used for the years 2009–2010, 2011–2015, and 2016–2020, respectively [23]. Selection  
180 bias among the target population was corrected by  $C_{d,t,a,s}$  and  $D_{d,t,r,a,s}$ , as described in eq.1.

181 Furthermore, using the commonly used 1985 model population as a reference population (i.e.,  
182 distribution of the population by age and sex groups in 1985) [24], age-adjusted prevalence was  
183 calculated for the 0–74, 0–39, and 40–74 years of age groups for males, females, and both males and  
184 females.

185 Diagnostic guidelines have been revised for various diseases, including the establishment of  
186 borderline hyperLDL-cholesterolemia in 2012 and the diagnosis of diabetes using HbA1c in 2010.

187 Although these revisions may have impacted the prevalence, the bias was reduced by standardizing  
188 the assessment of the impact before and after the Fukushima disaster by normalizing the prevalence  
189 with that for the whole of Japan (see “2.5. Analysis” for details).

190

## 191 **2.5. Analysis**

192 Two analyses were performed in this study. First, to evaluate changes in prevalence after the  
193 Fukushima disaster, we considered the whole of Japan, Iwate, Miyagi, and Fukushima prefectures, as  
194 well as three regions within Fukushima Prefecture (i.e., Hamadori, Nakadori, and Aizu (mountainous  
195 area); Table S2). These three regions, which are closer to the nuclear power station in the order  
196 Hamadori, Nakadori, and Aizu, divide Fukushima Prefecture into three parts from east to west. In  
197 other words, Hamadori was the region most affected by the disaster, and Aizu was the region least  
198 affected among regions in the prefecture. Prevalence of targeted diseases in the Hamadori, Nakadori,  
199 and Aizu regions was calculated by weighting data by municipality based on  $B_{t,r,a,s}$ . The arithmetic  
200 means and standard errors of the prevalence for each of the four time periods, such as 2009–2010,  
201 2011–2013, 2014–2016, and 2017–2019, was calculated, and the prevalence for each time period was  
202 assumed to follow a normal distribution. To ensure that the prevalence was within the range of 0–1,  
203 two-tailed censoring was performed so that the arithmetic mean was at the center of the distribution.  
204 Monte Carlo simulations were performed with 10,000 iterations to determine the ratio or difference  
205 in prevalence (males and females, 0–74 years) between 2011–2013, 2014–2016, or 2017–2019 and  
206 2009–2010 in the whole of Japan, Iwate, Miyagi, Fukushima prefectures, and Hamadori, Nakadori,  
207 and Aizu regions. These prevalence ratios and differences were further normalized to the values for  
208 the whole of Japan. Similarly, prevalence ratios and differences by age and sex groups were calculated

209 for the whole of Japan and Fukushima Prefecture.

210 Second, to assess changes in the prevalence after the COVID-19 outbreak, data from 2015 to 2020

211 were used (Table S3). For simplicity, we defined 2020 data as the period after the COVID-19 outbreak.

212 We calculated the ratios and differences between the prevalence in 2020 (the period after the outbreak)

213 and the prevalence in 2020 estimated from the 2015–2019 dataset. A linear regression equation was

214 modeled using the dataset as a baseline to estimate the hypothetical 2020 prevalence in the absence

215 of COVID-19. Based on the values and their 95% confidence intervals, calculations of the ratios and

216 differences between the measured and estimated prevalence were performed with Monte Carlo

217 simulations in 10,000 runs, assuming that the prevalence followed a normal distribution; two-tailed

218 censoring was performed so that the prevalence fell within the range of 0–1, and the arithmetic mean

219 was at the center of the distribution. The prevalence ratios and differences were estimated for age and

220 sex groups in the whole of Japan: males and females (0–74 years), males and females (0–39 years),

221 males and females (40–74 years), males (0–74 years), males (0–39 years), males (40–74 years), males

222 (0–19 years), males (20–39 years), males (40–64 years), males (65–74 years), females (0–74 years),

223 females (0–39 years), females (40–74 years), females (0–19 years), females (20–39 years), females

224 (40–64 years), and females (65–74 years). Furthermore, the prevalence ratios and differences in 47

225 prefectures were calculated for males (0–39 years), the vulnerable population group identified in the

226 above analysis, to assess the correlation with population density [22, 25] or the reported number of

227 COVID-19 infection cases per 100,000 people (COVID-19 infection rate) in 2020 [21] (Table S4).

228 Spearman's rank correlation coefficient was estimated.

229 Oracle Crystal Ball (Version 11.1.2.4.900) and IBM SPSS Statistics (Version 28) were used for the  
230 analysis.

231

### 232 **3. Results**

#### 233 **3.1. Age-adjusted prevalence over time**

234 Figure 1 shows the annual changes in age-adjusted prevalence (male and female, 0–74 years) of  
235 NCDs from 2009 to 2020 in the whole of Japan; Iwate, Miyagi, and Fukushima prefectures; and  
236 Hamadori, Nakadori, and Aizu regions. The age-adjusted prevalence of hypertension, hyperlipidemia,  
237 diabetes, and mental disorders in the whole of Japan was 0.102, 0.107, 0.061, and 0.075 in 2009 and  
238 0.113, 0.121, 0.068, and 0.098 in 2020, respectively. The age-adjusted prevalence of hypertension,  
239 hyperlipidemia, diabetes, and mental disorders in Fukushima Prefecture was 0.106, 0.098, 0.044, and  
240 0.072 in 2009 and 0.117, 0.119, 0.056, and 0.082 in 2020, respectively.

241 Age-adjusted prevalence by age and sex groups for each disease in the whole of Japan and Fukushima  
242 Prefecture from 2009 to 2020 is shown in Figures 2 and 3. Age-adjusted prevalence of hypertension,  
243 hyperlipidemia, and diabetes were generally higher in males than in females in the 40–74 years age  
244 group, and the differences tended to increase over time in the whole of Japan. In contrast, mental  
245 disorders were higher in females than in males in the 40–74 years age group, and the prevalence in  
246 the 0–39 years age group has been increasing in recent years. In Fukushima Prefecture, mental

247 disorders showed an increasing trend in 2011–2012 for both age and sex groups, followed by a  
248 decreasing trend.

249

### 250 **3.2. Age-adjusted prevalence before and after the Fukushima disaster**

251 Table 1 shows the ratios of age-adjusted prevalence of NCDs in the 0–74 years group in the whole of  
252 Japan; Iwate, Miyagi, and Fukushima prefectures; and Hamadori, Nakadori, and Aizu regions before  
253 and after the Fukushima disaster. These differences are listed in Table S5. The table also shows the  
254 values normalized to those for the whole of Japan. After the Fukushima disaster, the increases in the  
255 prevalence of hypertension, hyperlipidemia, and diabetes were significantly higher among the  
256 Fukushima Prefecture than among the whole of Japan in all the three time periods including 2011–  
257 2013, 2014–2016, and 2017–2019 (excluding hyperlipidemia in 2011–2013). The prevalence ratios  
258 in 2011–2013 were 1.133 (95% uncertainty interval (UI): 1.081–1.188) for hypertension, 1.053  
259 (0.980–1.132) for hyperlipidemia, 1.212 (1.082–1.344) for diabetes, and 1.084 (0.961–1.212) for  
260 mental disorders. Furthermore, in Hamadori, the prevalence of hypertension, diabetes, and mental  
261 disorders generally increased over the 9-year period while in Nakadori, significant increases in the  
262 prevalence of hyperlipidemia and diabetes were observed in 2014–2016 and 2017–2019. In Aizu,  
263 there were also significant increases in the prevalence of hypertension in 2011–2013 and 2014–2016  
264 and of diabetes in 2014–2016 and 2017–2019. In contrast, a slight downward trend was observed for  
265 hyperlipidemia in 2011–2013. No significant increases or decreases were observed for these four

266 diseases in Iwate and Miyagi prefectures (excluding hypertension in 2014–2016 and diabetes in  
267 2011–2013 in Iwate Prefecture).

268 Regarding age and sex groups, there was a significant increase in the prevalence of these four diseases  
269 in Fukushima Prefecture during all the three time periods in females aged 40–74 years: ratios in 2011–  
270 2013 were 1.280 (95%UI:1.214–1.350) for hypertension, 1.149 (1.055–1.257) for hyperlipidemia,  
271 1.441 (1.139–1.806) for diabetes, and 1.283 (1.199–1.371) for mental disorders (Table 2, ratios and  
272 Table S6, difference). An increase in the prevalence of hypertension and diabetes was observed in  
273 females aged 0–39 years. In contrast, among males aged 40–74 years, the prevalence of  
274 hyperlipidemia and diabetes increased significantly in 2014–2016 and 2017–2019, whereas the  
275 prevalence of mental disorders decreased in 2014–2016 and 2017–2019. Among males aged 0–39  
276 years, there was an increase in the prevalence of hyperlipidemia in 2014–2016 and 2017–2019,  
277 whereas there was no significant change in the prevalence of other diseases (except hypertension in  
278 2014–2016).

279

### 280 **3.3. Age-adjusted prevalence before and after the COVID-19 outbreak**

281 Tables 3 and S7 show the ratios and differences in age-adjusted prevalence of each disease by sex  
282 and age group among the whole of Japan before and after the COVID-19 outbreak. The prevalence  
283 of all four diseases generally increased, with the ratios among males and females aged 0–74 years  
284 being 1.058 (95% UI: 1.032–1.087) for hypertension, 1.075 (1.013–1.143) for hyperlipidemia, 1.038

285 (1.012–1.066) for diabetes, and 1.033 (1.027–1.039) for mental disorders. Among the age and sex  
286 groups, the ratios of actual to estimated values for these four diseases were particularly high among  
287 males aged 20–39 years and 0–39 years (ratio among males aged 0–39 years: 1.098 (1.072–1.126)  
288 for hypertension, 1.143 (1.009–1.309) for hyperlipidemia, 1.060 (1.040–1.080) for diabetes, and  
289 1.041 (1.032–1.050) for mental disorders). In contrast, the differences in prevalence were large for  
290 males and females aged 40–64, 64–74, and 40–74 years.

291 The ratios and differences in the prevalence of mental disorders before and after the COVID-19  
292 outbreak by prefecture in males aged 0–39 years were significantly negatively correlated with the  
293 population density and COVID-19 infection rate in 2020 (Figure 4 and Tables S8 and 9). In contrast,  
294 the population density and COVID-19 infection rates were not significantly associated with the  
295 prevalence ratios and differences in other diseases.

296

#### 297 **4. Discussion**

298 In this study, we evaluated the annual changes in the prevalence of hypertension, hyperlipidemia,  
299 diabetes, and mental disorders among employees of companies and their dependent family members  
300 belonging to the EHI scheme before and after the Fukushima disaster and the COVID-19 outbreak in  
301 Japan. Furthermore, we identified the vulnerable age and sex groups of people who experienced  
302 significant secondary health effects after the disaster and pandemic.

303 The analysis of the prevalence of these diseases after the Fukushima disaster by age and sex groups



304 revealed that hypertension, hyperlipidemia, and diabetes generally increased in Fukushima Prefecture  
305 over the 9-year period following the disaster. Significant increases in hypertension, diabetes, and  
306 mental disorders were observed in Hamadori, hyperlipidemia and diabetes in Nakadori, and  
307 hypertension and diabetes in Aizu. Among the four diseases, the increase prevalence of diabetes was  
308 higher than that of the other diseases. Diabetes increased consistently in all the regions.

309 After the Fukushima disaster, a significant increase in the prevalence of diabetes was consistently  
310 reported in multiple previous studies targeting various municipalities where evacuation orders were  
311 issued [3-5, 8]. The findings of our study are consistent with those of previous studies. For  
312 hyperlipidemia, previous studies reported an increase among evacuees within 4 years after the disaster,  
313 but no significant increase in the 7-year data [3, 8]. For hypertension, some studies that used a  
314 definition based on blood pressure alone have reported a risk decrease [3, 8], whereas a study that  
315 used a definition based on blood pressure as well as the use of antihypertensive medication reported  
316 an increased risk [5]. Regarding psychological distress, a 5-fold risk increase was reported in the first  
317 year after the disaster, followed by an improvement trend [26]. Notably, this study highlighted that  
318 the worsening prevalence of these NCDs was not observed in only Hamadori, which was significantly  
319 affected by the Fukushima disaster, but also in Nakadori and Aizu. This is consistent with previous  
320 findings on non-evacuees [3, 8]. The results suggest that the Fukushima disaster may have secondary  
321 physical health effects not only on evacuees but also on the wider population. The reasons for this are  
322 not clear; however, social support for non-evacuees is more likely to be overlooked in the aftermath

323 of a disaster than that for evacuees. Considering that these diseases generally did not change in the  
324 Iwate and Miyagi prefectures that were affected by the GJET, but not largely by the Fukushima  
325 disaster, it is possible that the increase in the prevalence of these diseases observed over a wide area  
326 in Fukushima Prefecture was related to the long-term evacuation, hosting of evacuees, and  
327 socioeconomic changes in the residents of Fukushima Prefecture following the disaster, possibly  
328 resulting in lifestyle changes among residents. Hamadori, where a significant increase in the  
329 prevalence of mental disorders was observed, includes not only municipalities whose residents were  
330 ordered to evacuate, but also those that accepted majority of evacuees. It has also been suggested that  
331 psychological distress among residents of host communities may be caused by the perception that  
332 evacuees are a threat to their social identity [9].

333 The increase in the prevalence of these four diseases in the post-disaster period was most pronounced  
334 among females and those aged 40–74 years. Psychological distress risk has been reported to be higher  
335 among elderly females [27]. Most of the previous studies after the Fukushima disaster have assessed  
336 the impact of evacuation on NCDs [3-5, 8], and there are limited studies that specifically discuss  
337 which age and sex groups experienced significant changes in prevalence after the disaster based on  
338 the same dataset. The strength of this study is that, based on the same dataset, changes in the  
339 prevalence after the disaster were assessed by age and sex groups to identify populations vulnerable  
340 to secondary health effects.

341 In contrast, after the COVID-19 outbreak, the prevalence of all four diseases increased nationwide,

342 especially in males aged 20–39 and 0–39 years. Among the four diseases, the prevalence increase  
343 post-disaster in hyperlipidemia was particularly higher than that in the other diseases. To date,  
344 previous findings on NCDs risks after COVID-19 have not been coherent. While some population  
345 have improved their lifestyle habits [11, 12], others have decreased their physical activity levels due  
346 to lockdown and other behavioral restrictions [28]. Molarius et al. [29] reported no statistically  
347 significant changes in the prevalence of high blood pressure before and after the COVID-19 outbreak  
348 in Sweden. A systematic review regarding the impact of the COVID-19-related lockdown on  
349 glycemic control among patients with type 1 and type 2 diabetes reported that glycemic values in  
350 patients with type 1 diabetes improved, but those in patients with type 2 diabetes worsened during  
351 the COVID-19 lockdown [14]. An increasing burden of mental disorders due to the COVID-19  
352 pandemic has been reported among the public worldwide [15]. In Japan, since the early days of the  
353 COVID-19 pandemic, active efforts have been made to raise awareness of exercise to promote  
354 physical and psychological health [30, 31]. Despite these social awareness efforts, our study showed  
355 that the prevalence of NCDs were increasing in Japan, especially among young males.  
356 Interestingly, the age and sex groups that showed large increases in the prevalence of these diseases  
357 differed between the Fukushima disaster and COVID-19 outbreak. After the COVID-19 outbreak, not  
358 only were there risk factors such as lack of exercise and worsening of dietary and drinking habits  
359 associated with measures such as stay-at-home requests, but also preventive factors such as reduced  
360 drinking opportunities and lifestyle modification. The pandemic may have resulted in polarization,

361 with some individuals experiencing improved health and others experiencing worsened health. The  
362 young Japanese male population tends to have lower health practices than those of other age and sex  
363 groups [32], possibly resulting in significant secondary health effects due to the pandemic. In addition,  
364 the prevalence ratios of mental disorders before and after the outbreak was significantly negatively  
365 correlated with population density and COVID-19 infection rates. This suggests that the increased  
366 prevalence in mental disorders was not mainly attributed to the burden among patients with COVID-  
367 19, but also attributed to other social factors. Interestingly, the results of this study were in contrast  
368 to that of a previous study reporting that increases in major depressive and anxiety disorders in each  
369 country were significantly positively correlated with the rate of COVID-19 infection [15]. Although  
370 there were some differences in the timing of declaration of the state of emergency, it was issued in all  
371 prefectures in 2020 in Japan. Therefore, the differences in the impact of social activity restrictions  
372 associated with these regulations were probably small among the prefectures. There are two possible  
373 reasons for the negative association between population density and increased rate of mental disorders  
374 found in this study. First, the availability of mental health-promotion services and social infrastructure  
375 may differ among prefectures; urban areas may have had better access to mental health-promotion  
376 services and social infrastructure, even under restricted social activities during the COVID-19  
377 pandemic. Second, there may be differences in the cultural worldviews of infection and related  
378 preventive behaviors among prefectures. The Japanese people are more likely to consider that infected  
379 individuals deserve COVID-19 infections than the people in other countries [33], which is consistent

380 with a previous finding that Japan has a strong strict cultural view (i.e., many strong norms and low  
381 tolerance of deviant behavior) compared to that observed world [34]. It is possible that the social  
382 environment toward COVID-19 infection, shaped by this cultural worldview, had a negative impact  
383 on mental health among the population. Differences in strict cultural worldviews among prefectures  
384 in Japan and their relationship with mental disorders remain unclear and require further analysis.

385 This study demonstrates the importance of providing support for secondary health effects on NCDs  
386 in the aftermath of disasters and pandemics. Since significantly affected age and sex groups are unique  
387 to each disaster or pandemic, tailor-made public health support is considered important. In particular,  
388 while COVID-19 infections have a high fatality rate among the elderly [35], NCDs are more likely  
389 to affect young people. This means that infection control measures, including stay-at-home requests  
390 and other restrictions on socioeconomic activities, may be beneficial in reducing infection among the  
391 elderly under 75 years of age but may pose greater risks for the young regarding secondary health  
392 effects. Comprehensive public health measures in addition to infection control are required based on  
393 the characteristics of the population while considering the differences in the balance between risk-  
394 benefits and non-infectious secondary health effects among the populations.

395 This study has some limitations. First, the target population was employees of companies and their  
396 dependent family members. The findings of this study cannot be generalized to the entire population  
397 and other countries. Furthermore, only the population aged 74 years and below were included in this  
398 study. Although COVID-19 isolation measures are known to worsen cognitive and mental health

399 among people with dementia [36], this study was unable to assess the secondary health effects among  
400 the population aged 75 years and older. Second, we could not fully examine the possibility of changes  
401 in accessibility to healthcare facilities after the Fukushima disaster or the COVID-19 outbreak  
402 compared to accessibility to health care before the disaster and outbreak. However, it is unlikely that  
403 NCDs were overlooked before the disaster or outbreak, since employees of companies, the target  
404 population of this study, generally receive regular health checkups. Third, this study was based on an  
405 ecological study design and did not identify the causes of changes in the prevalence of various  
406 diseases. Long-term cohort studies based on individuals exposed to disasters and pandemics are  
407 expected to assess the impact of disasters and pandemics on secondary health and identify the factors  
408 that influence this impact.

409 Despite these limitations, this study provided unique insights into the secondary health effects of the  
410 Fukushima disaster and COVID-19 outbreak and identified age and sex groups that were significantly  
411 affected by this disaster and pandemic.

412

## 413 **5. Conclusions**

414 This study used health insurance receipt data for employees of companies and their dependent family  
415 members from January 2009 to December 2020 to assess changes in the prevalence of NCDs after  
416 the Fukushima disaster and COVID-19 outbreak in Japan compared to that before the disaster and  
417 outbreak and to identify age and sex groups particularly vulnerable to the resultant secondary health

418 effects. The findings of this study are summarized as follows.

- 419 ● Age-adjusted prevalence of hypertension, hyperlipidemia, and diabetes increased over a 9-year  
420 period in the Fukushima Prefecture following the 2011 Fukushima disaster. An increase in the  
421 prevalence in mental disorders was also observed in the Hamadori region in the prefecture, which  
422 was most affected by the disaster.
- 423 ● Increase prevalence in hypertension, hyperlipidemia, and diabetes were also observed in  
424 Hamadori and Aizu, which were less affected by the disaster, indicating that the Fukushima  
425 disaster had secondary health effects over wider populations.
- 426 ● In contrast, no significant changes were observed for these four diseases in Iwate and Miyagi  
427 prefectures.
- 428 ● After the Fukushima disaster, the prevalence ratios of these four diseases were particularly high  
429 among females aged 40–74 years.
- 430 ● After the COVID-19 outbreak, the prevalence of these four diseases has increased significantly  
431 throughout Japan. In particular, the post-outbreak prevalence ratios of these four diseases were  
432 significantly higher among males aged 0–39 years than among females and males of other age  
433 groups, which differed from the age and sex groups vulnerable to secondary health effects after  
434 the Fukushima disaster.
- 435 ● Post-outbreak prevalence ratios of mental disorders among males aged 0–39 years by prefecture  
436 were negatively and significantly associated with population density and COVID-19 infection

437 rates.

438 ● The population groups vulnerable to secondary health effects on NCDs after the Fukushima  
439 disaster or the COVID-19 outbreak are not common but are unique to the disaster or pandemic.

440 It is important to provide tailor-made public health support to the population accordance to  
441 disasters and pandemics.

442

#### 443 **Acknowledgements**

444 This work was supported by JSPS KAKENHI grant number JP20H04354. We would like to thank  
445 Editage ([www.editage.com](http://www.editage.com)) for English language editing and Dr. Kazuki Ide (Osaka University) for  
446 his advice.

447

#### 448 **Declaration of competing interest**

449 None.

450

#### 451 **Authorship contribution**

452 Michio Murakami: Conceptualization; Data curation; Methodology; Formal analysis; Visualization;

453 Project administration; Writing –original draft

454 Shuhei Nomura: Conceptualization; Writing –review & editing

455



456 **References**

- 457 [1] E.J. Bromet, Mental health consequences of the Chernobyl disaster, *J. Radiol. Prot.* 32 (2012)  
458 N71-75.
- 459 [2] J.C. Moscona, M.N. Peters, R. Maini, P. Katigbak, B. Deere, H. Gonzales, C. Westley, H.  
460 Baydoun, K. Yadav, P. Ters, A. Jabbar, A. Boulad, I. Mahata, T.V. Gadiraju, R. Nelson, S.  
461 Srivastav, A. Irimpen, The incidence, risk factors, and chronobiology of acute myocardial  
462 infarction ten years after Hurricane Katrina, *Disaster Med Public Health Prep* 13 (2018) 217-222.
- 463 [3] S. Nomura, M. Blangiardo, M. Tsubokura, A. Ozaki, T. Morita, S. Hodgson, Postnuclear disaster  
464 evacuation and chronic health in adults in Fukushima, Japan: A long-term retrospective analysis,  
465 *BMJ Open* 6 (2016) e010080.
- 466 [4] D.K. Ebner, M. Ohsawa, K. Igari, K.H. Harada, A. Koizumi, Lifestyle-related diseases following  
467 the evacuation after the Fukushima Daiichi nuclear power plant accident: A retrospective study  
468 of Kawauchi Village with long-term follow-up, *BMJ Open* 6 (2016) e011641.
- 469 [5] T. Ohira, H. Nakano, M. Nagai, Y. Yumiya, W. Zhang, M. Uemura, A. Sakai, S. Hashimoto,  
470 Changes in cardiovascular risk factors after the Great East Japan Earthquake, *Asia-Pac. J. Public*  
471 *He.* 29 (2017) 47s-55s.
- 472 [6] M. Maeda, M. Murakami, M. Oe. Fukushima nuclear disaster: multidimensional psychosocial  
473 issues and challenges to overcome them, in: Nriagu J, (Ed.). *Encyclopedia of Environmental*  
474 *Health (Second Edition)* Elsevier; Oxford, 2019. pp. 121-131.

- 475 [7] Y. Kuroda, M. Orui, A. Hori, Trends in suicide mortality in 10 years around the great east japan  
476 earthquake: Analysis of evacuation and non-evacuation areas in fukushima prefecture, *Int. J.*  
477 *Environ. Res. Pub. He.* 18 (2021).
- 478 [8] S. Nomura, M. Murakami, A. Ozaki, T. Sawano, C. Leppold, Y. Nishikawa, H. Saito, T. Oikawa,  
479 M. Tsubokura, Comparative risk assessment of non-communicable diseases by evacuation  
480 scenario– a retrospective study in the 7 years following the Fukushima Daiichi nuclear power  
481 plant accident, *Glob. Health Action* 14 (2021) 1918886.
- 482 [9] T. Kobayashi, K. Yoshida, Y. Takebayashi, A. Goto, A. Kumagai, M. Murakami, Social identity  
483 threats following the Fukushima nuclear accident and its influence on psychological distress, *Int.*  
484 *J. Disaster Risk Reduction* 37 (2019) 101171.
- 485 [10] L. Di Renzo, P. Gualtieri, F. Pivari, L. Soldati, A. Attinà, G. Cinelli, G. Cinelli, C. Leggeri, G.  
486 Caparello, L. Barrea, F. Scerbo, E. Esposito, A. De Lorenzo, Eating habits and lifestyle changes  
487 during COVID-19 lockdown: An Italian survey, *J. Transl. Med.* 18 (2020) 229.
- 488 [11] M. Murakami, T. Kobayashi, Y. Oikawa, S. Goto, M. Momoi, Y. Takebayashi, T. Ohira, S.  
489 Yasumura, M. Maeda, Associations of the COVID-19 pandemic with the economic status and  
490 mental health of people affected by the Fukushima disaster using the difference-in-differences  
491 method: The Fukushima Health Management Survey, *SSM Popul Health* 14 (2021) 100801.
- 492 [12] S. Samanta, J. Banerjee, S.N. Rahaman, K.M. Ali, R. Ahmed, B. Giri, A. Pal, S.K. Dash,  
493 Alteration of dietary habits and lifestyle pattern during COVID-19 pandemic associated

- 494 lockdown: An online survey study, *Clin. Nutr. ESPEN* 48 (2022) 234-246.
- 495 [13]M. Pellegrini, V. Ponzio, R. Rosato, E. Scumaci, I. Goitre, A. Benso, S. Belcastro, C. Crespi, F.  
496 De Michieli, E. Ghigo, F. Broglio, S. Bo, Changes in weight and nutritional habits in adults with  
497 obesity during the “lockdown” period caused by the COVID-19 virus emergency, *Nutrients* 12  
498 (2020) 1-11.
- 499 [14]C. Eberle, S. Stichling, Impact of COVID-19 lockdown on glycemic control in patients with type  
500 1 and type 2 diabetes mellitus: a systematic review, *Diabetology & Metabolic Syndrome* 13  
501 (2021) 95.
- 502 [15]D.F. Santomauro, A.M. Mantilla Herrera, J. Shadid, P. Zheng, C. Ashbaugh, D.M. Pigott, C.  
503 Abbafati, C. Adolph, J.O. Amlag, A.Y. Aravkin, B.L. Bang-Jensen, G.J. Bertolacci, S.S. Bloom,  
504 R. Castellano, E. Castro, S. Chakrabarti, J. Chattopadhyay, R.M. Cogen, J.K. Collins, X. Dai,  
505 W.J. Dangel, C. Dapper, A. Deen, M. Erickson, S.B. Ewald, A.D. Flaxman, J.J. Frostad, N.  
506 Fullman, J.R. Giles, A.Z. Giref, G. Guo, J. He, M. Helak, E.N. Hulland, B. Idrisov, A. Lindstrom,  
507 E. Linebarger, P.A. Lotufo, R. Lozano, B. Magistro, D.C. Malta, J.C. Månsson, F. Marinho, A.H.  
508 Mokdad, L. Monasta, P. Naik, S. Nomura, J.K. O'Halloran, S.M. Ostroff, M. Pasovic, L.  
509 Penberthy, R.C. Reiner Jr, G. Reinke, A.L.P. Ribeiro, A. Sholokhov, R.J.D. Sorensen, E.  
510 Varavikova, A.T. Vo, R. Walcott, S. Watson, C.S. Wiysonge, B. Zigler, S.I. Hay, T. Vos, C.J.L.  
511 Murray, H.A. Whiteford, A.J. Ferrari, Global prevalence and burden of depressive and anxiety  
512 disorders in 204 countries and territories in 2020 due to the COVID-19 pandemic, *Lancet* 398

513 (2021) 1700-1712.

514 [16]National Police Agency, Police measures and damage from the Tohoku-Pacific Ocean  
515 Earthquake in 2011. <https://www.npa.go.jp/news/other/earthquake2011/pdf/higaijyoukyou.pdf>,  
516 2022 (accessed 27 April, 2022). (in Japanese)

517 [17]Reconstruction Agency, Number of disaster-related deaths.  
518 <https://www.reconstruction.go.jp/topics/main-cat2/sub-cat2-6/20140526131634.html>, 2021  
519 (accessed 27 April, 2022). (in Japanese)

520 [18]Reconstruction Agency, Changes in the number of people living in evacuation shelters.  
521 <https://www.reconstruction.go.jp/topics/hikaku2.pdf>, 2022 (accessed 27 April, 2022). (in  
522 Japanese)

523 [19]The National Diet of Japan, The official report of the Fukushima Nuclear Accident Independent  
524 Investigation Commission. [https://www.nirs.org/wp-](https://www.nirs.org/wp-content/uploads/fukushima/naiic_report.pdf)  
525 [content/uploads/fukushima/naiic\\_report.pdf](https://www.nirs.org/wp-content/uploads/fukushima/naiic_report.pdf), 2012 (accessed 3 May, 2020).

526 [20]D. Cucinotta, M. Vanelli, WHO Declares COVID-19 a Pandemic, *Acta Biomed.* 91 (2020) 157-  
527 160.

528 [21]Ministry of Health Labour and Welfare, COVID-19 open data.  
529 <https://www.mhlw.go.jp/stf/covid-19/open-data.html>, 2022 (accessed 27 April, 2022). (in  
530 Japanese)

531 [22]e-Stat, Population, demographic and household surveys based on the Basic Resident Register.

- 532 <https://www.e-stat.go.jp/stat-search/files?page=1&toukei=00200241&tstat=000001039591>,
- 533 2021 (accessed 27 April, 2022). (in Japanese)
- 534 [23] Statistics Bureau of Japan, National Census.
- 535 <https://www.stat.go.jp/data/kokusei/2020/kekka.html>, 2021 (accessed 27 April, 2022). (in
- 536 Japanese)
- 537 [24] Ministry of Health Labour and Welfare, Deaths by Prefecture - Age-adjusted mortality rates by
- 538 Prefecture in 2000. <https://www.mhlw.go.jp/toukei/saikin/hw/jinkou/other/00sibou/1.html>, 2002
- 539 (accessed 9 May, 2022). (in Japanese)
- 540 [25] Geospatial Information Authority of Japan, National area survey by prefecture and municipality.
- 541 <https://www.gsi.go.jp/KOKUJYOHO/OLD-MENCHO-title.htm>, 2020 (accessed 27 April, 2022).
- 542 (in Japanese)
- 543 [26] M. Maeda, M. Oe, Mental health consequences and social issues after the Fukushima disaster,
- 544 *Asia Pac J Public Health* 29 (2017) 36s-46s.
- 545 [27] M. Oe, S. Fujii, M. Maeda, M. Nagai, M. Harigane, I. Miura, H. Yabe, T. Ohira, H. Takahashi, Y.
- 546 Suzuki, S. Yasumura, M. Abe, Three-year trend survey of psychological distress, posttraumatic
- 547 stress, and problem drinking among residents in the evacuation zone after the Fukushima Daiichi
- 548 Nuclear Power Plant accident [The Fukushima Health Management Survey], *Psychiatry. Clin.*
- 549 *Neurosci.* 70 (2016) 245-252.
- 550 [28] G.H. Tison, R. Avram, P. Kuhar, S. Abreau, G.M. Marcus, M.J. Pletcher, J.E. Olgin, *Worldwide*

- 551 effect of COVID-19 on physical activity: A descriptive study, *Ann. Intern. Med.* 173 (2020) 767-  
552 770.
- 553 [29] A. Molarius, C. Persson, Living conditions, lifestyle habits and health among adults before and  
554 after the COVID-19 pandemic outbreak in Sweden - results from a cross-sectional population-  
555 based study, *BMC Pub. He.* 22 (2022) 171.
- 556 [30] K. Yamaguchi, Y. Takebayashi, M. Miyamae, A. Komazawa, C. Yokoyama, M. Ito, Role of  
557 focusing on the positive side during COVID-19 outbreak: Mental health perspective from  
558 positive psychology, *Psychol. Trauma: Theory Res. Pract. Policy* 12 (2020) S49-S50.
- 559 [31] M.N. Aung, M. Yuasa, Y. Koyanagi, T.N.N. Aung, S. Moolphate, H. Matsumoto, T. Yoshioka,  
560 Sustainable health promotion for the seniors during COVID-19 outbreak: A lesson from Tokyo,  
561 *J. Infect. Dev. Ctries.* 14 (2020) 328-331.
- 562 [32] Y. Noguchi, K. Ueda, K. Fukumoto, K. Harada, A. Ueda, C.-N. Wei, Relationship between  
563 perceived health status and health practices in the general adult population in Japan, *Open J. Prev.*  
564 *Med.* 5 (2015) 11.
- 565 [33] A. Miura, K. Hiraishi, D. Nakanishi, Do they get what they deserved? : Exploring "situational  
566 power" with social psychology, *Kagaku* 90 (2020) 906-908. (in Japanese)
- 567 [34] M.J. Gelfand, J.L. Raver, L. Nishii, L.M. Leslie, J. Lun, B.C. Lim, L. Duan, A. Almaliach, S.  
568 Ang, J. Arnadottir, Z. Aycan, K. Boehnke, P. Boski, R. Cabecinhas, D. Chan, J. Chhokar, A.  
569 D'Amato, M. Ferrer, I.C. Fischlmayr, R. Fischer, M. Fülöp, J. Georgas, E.S. Kashima, Y.

570 Kashima, K. Kim, A. Lempereur, P. Marquez, R. Othman, B. Overlaet, P. Panagiotopoulou, K.  
571 Peltzer, L.R. Perez-Florizno, L. Ponomarenko, A. Realo, V. Schei, M. Schmitt, P.B. Smith, N.  
572 Soomro, E. Szabo, N. Taveesin, M. Toyama, E.V.d. Vliert, N. Vohra, C. Ward, S. Yamaguchi,  
573 Differences between tight and loose cultures: A 33-nation study, *Science* 332 (2011) 1100-1104.  
574 [35] COVID-19 Forecasting Team, Variation in the COVID-19 infection-fatality ratio by age, time,  
575 and geography during the pre-vaccine era: a systematic analysis, *Lancet* 399 (2022) 1469-1488.  
576 [36] A. Suárez-González, J. Rajagopalan, G. Livingston, S. Alladi, The effect of COVID-19 isolation  
577 measures on the cognition and mental health of people living with dementia: A rapid systematic  
578 review of one year of quantitative evidence, *eClinicalMedicine* 39 (2021).  
579

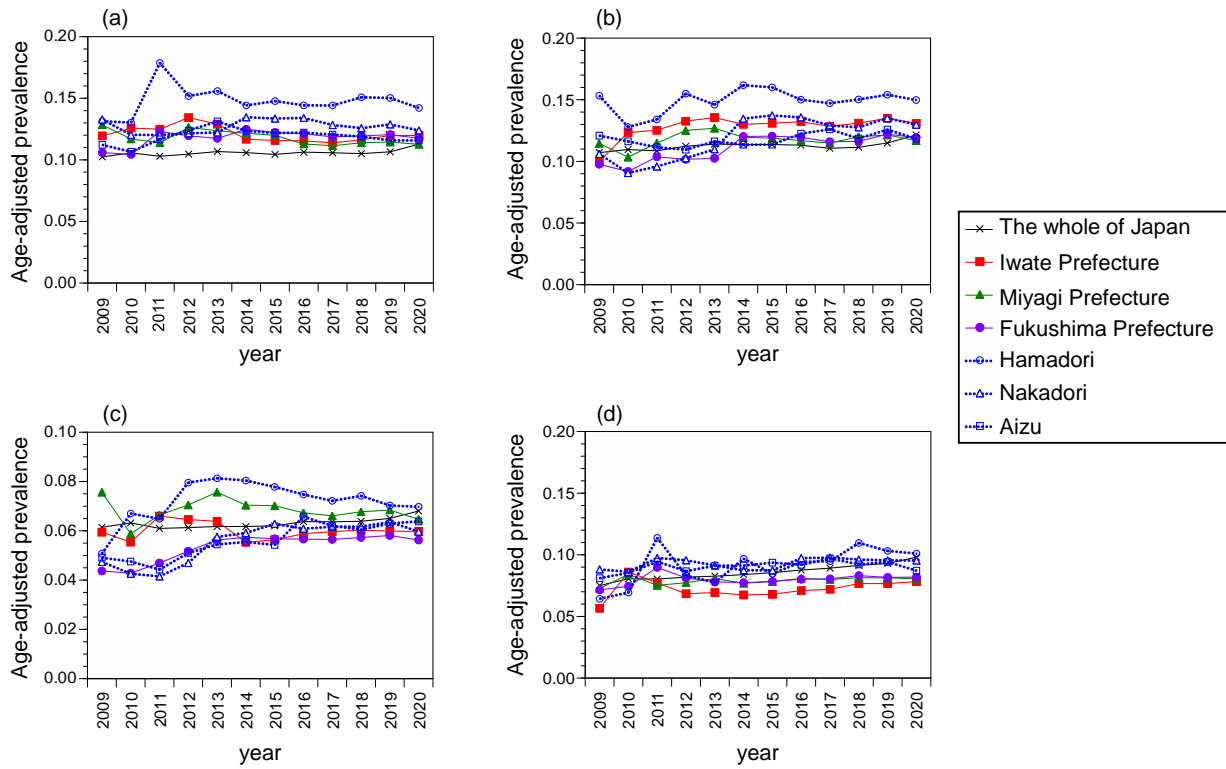

580

581 Figure 1. Annual age-adjusted prevalence of hypertension, hyperlipidemia, diabetes, and mental  
582 disorders by areas (males and females, 0–74 years). (a) Hypertension, (b) hyperlipidemia, (c) diabetes,  
583 (d) mental disorders.



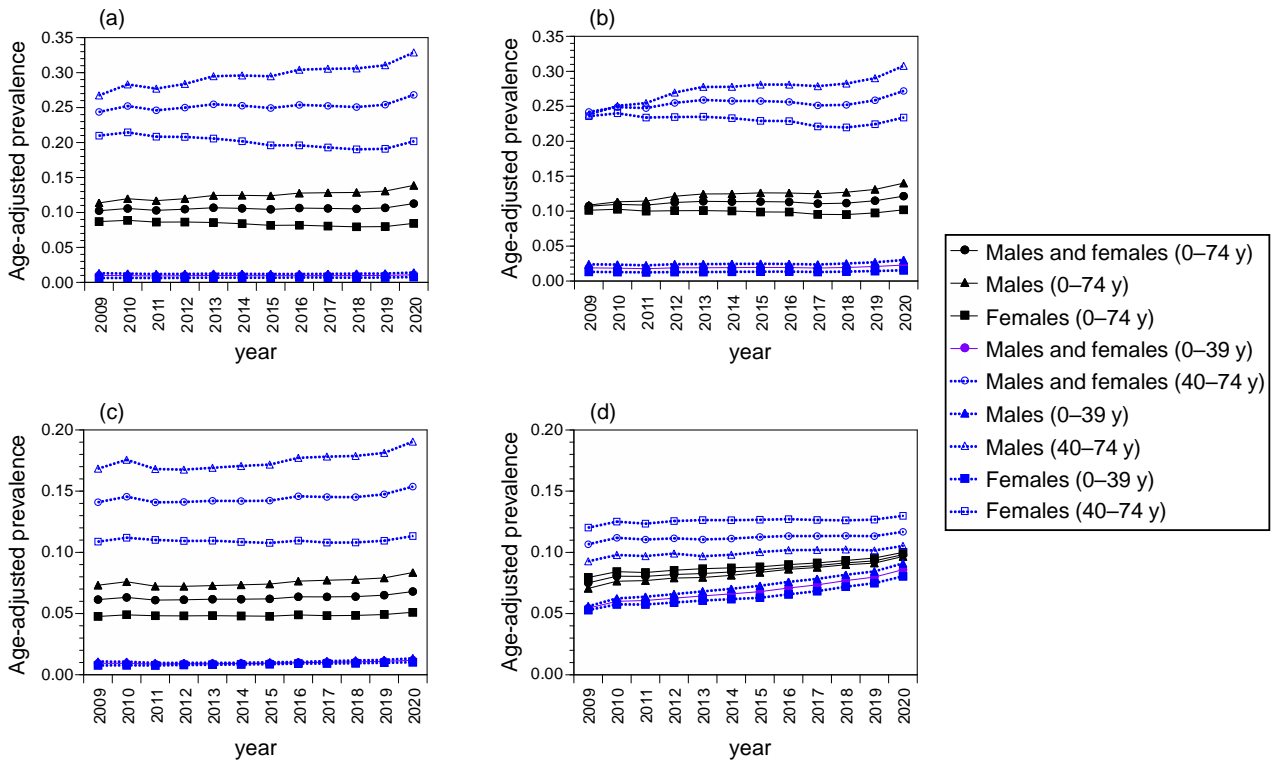

584

585 Figure 2. Annual age-adjusted prevalence of hypertension, hyperlipidemia, diabetes, and mental  
586 disorders by age group and sexes (the whole of Japan). (a) Hypertension, (b) hyperlipidemia, (c)  
587 diabetes, (d) mental disorders.

588

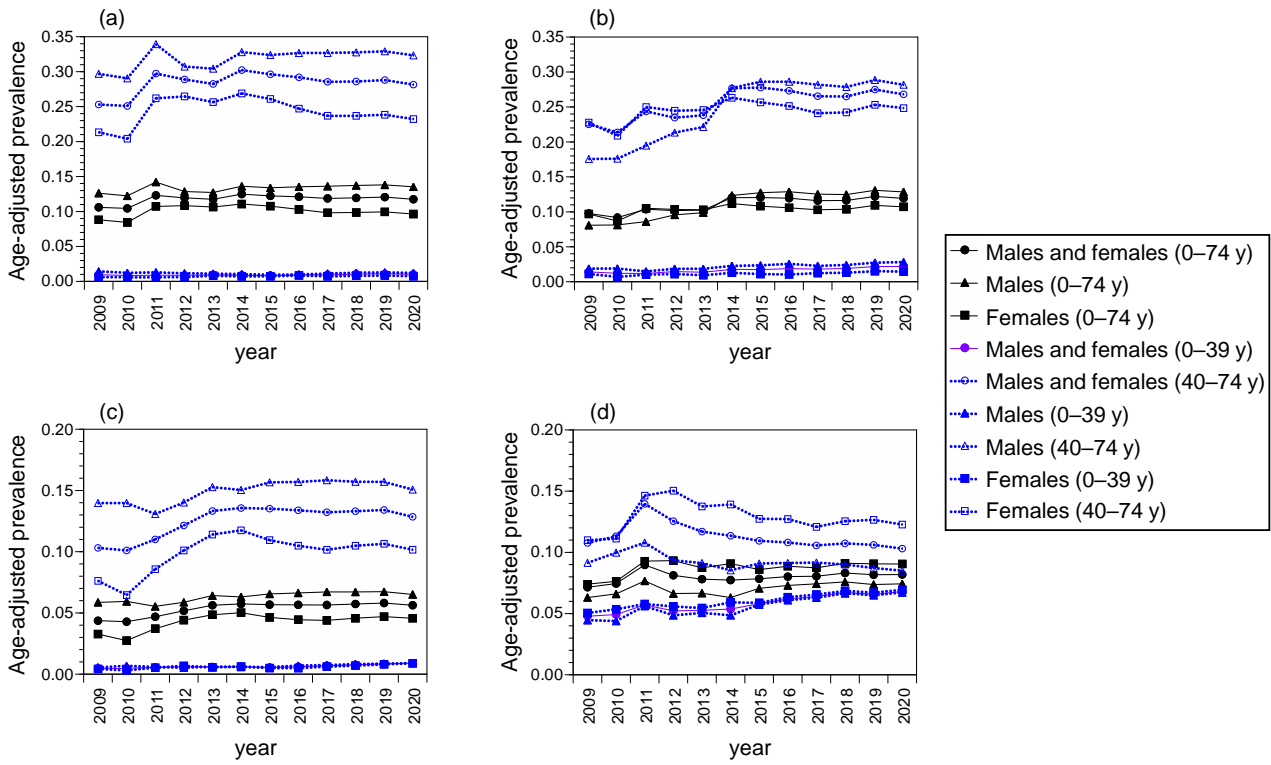

589

590 Figure 3. Annual age-adjusted prevalence of hypertension, hyperlipidemia, diabetes, and mental  
591 disorders by age groups and sexes (Fukushima Prefecture). (a) Hypertension, (b) hyperlipidemia, (c)  
592 diabetes, (d) mental disorders.

593

594

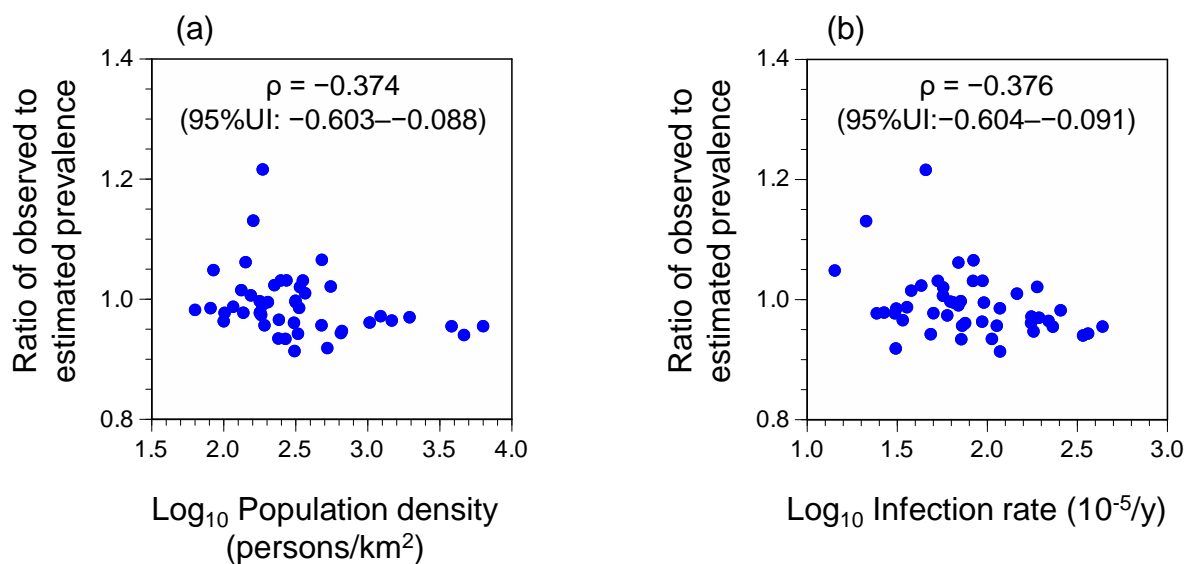

595

596 Figure 4. Correlations between population density or infection rate and ratio of observed to estimated  
597 age-adjusted prevalence of mental disorders in 2020 among 47 prefectures (males, 0–39 years). (a)  
598 Population density, (b) infection rate.  $\rho$ : Spearman's rank correlation coefficient. UI: uncertainty  
599 interval.

600

601

Table 1. Ratio of age-adjusted prevalence in three time periods to that in 2009–2010 (males and females, 0–74 years). Arithmetic mean (95% uncertainty interval).

| Ages and sexes                             | Hypertension           |                        |                        | Hyperlipidemia         |                        |                        | Diabetes               |                        |                        | Mental disorders       |                        |                        |
|--------------------------------------------|------------------------|------------------------|------------------------|------------------------|------------------------|------------------------|------------------------|------------------------|------------------------|------------------------|------------------------|------------------------|
|                                            | 2011–2013 vs 2009–2010 | 2014–2016 vs 2009–2010 | 2017–2019 vs 2009–2010 | 2011–2013 vs 2009–2010 | 2014–2016 vs 2009–2010 | 2017–2019 vs 2009–2010 | 2011–2013 vs 2009–2010 | 2014–2016 vs 2009–2010 | 2017–2019 vs 2009–2010 | 2011–2013 vs 2009–2010 | 2014–2016 vs 2009–2010 | 2017–2019 vs 2009–2010 |
| The whole of Japan                         | 1.007<br>(0.971–1.045) | 1.014<br>(0.983–1.047) | 1.017<br>(0.986–1.049) | 1.030<br>(0.994–1.067) | 1.047<br>(1.024–1.071) | 1.037<br>(1.004–1.070) | 0.985<br>(0.957–1.013) | 1.003<br>(0.970–1.038) | 1.030<br>(0.999–1.062) | 1.051<br>(0.979–1.129) | 1.104<br>(1.026–1.189) | 1.174<br>(1.092–1.263) |
| Iwate Prefecture                           | 1.056<br>(0.988–1.127) | 0.946<br>(0.899–0.998) | 0.952<br>(0.897–1.011) | 1.187<br>(0.971–1.480) | 1.187<br>(0.973–1.473) | 1.190<br>(0.975–1.476) | 1.129<br>(1.052–1.214) | 0.991<br>(0.917–1.071) | 1.045<br>(0.976–1.121) | 1.057<br>(0.712–1.705) | 1.015<br>(0.688–1.628) | 1.109<br>(0.751–1.781) |
| Miyagi Prefecture                          | 0.991<br>(0.887–1.107) | 0.965<br>(0.872–1.070) | 0.925<br>(0.844–1.019) | 1.126<br>(1.001–1.266) | 1.090<br>(0.986–1.211) | 1.093<br>(0.986–1.217) | 1.071<br>(0.834–1.413) | 1.047<br>(0.825–1.363) | 1.019<br>(0.801–1.325) | 0.997<br>(0.862–1.160) | 1.010<br>(0.876–1.170) | 1.037<br>(0.901–1.200) |
| Fukushima Prefecture                       | 1.141<br>(1.107–1.175) | 1.167<br>(1.141–1.194) | 1.137<br>(1.118–1.155) | 1.084<br>(1.021–1.155) | 1.269<br>(1.194–1.350) | 1.247<br>(1.163–1.340) | 1.193<br>(1.067–1.319) | 1.316<br>(1.289–1.343) | 1.324<br>(1.291–1.357) | 1.137<br>(1.034–1.244) | 1.078<br>(1.031–1.128) | 1.121<br>(1.073–1.171) |
| Hamadori                                   | 1.239<br>(1.113–1.365) | 1.111<br>(1.092–1.131) | 1.134<br>(1.101–1.168) | 1.038<br>(0.855–1.275) | 1.127<br>(0.942–1.364) | 1.078<br>(0.907–1.302) | 1.302<br>(0.963–1.782) | 1.342<br>(1.032–1.806) | 1.249<br>(0.963–1.679) | 1.369<br>(1.031–1.721) | 1.377<br>(1.236–1.532) | 1.535<br>(1.371–1.714) |
| Nakadori                                   | 0.962<br>(0.876–1.062) | 1.063<br>(0.968–1.175) | 1.012<br>(0.920–1.119) | 1.051<br>(0.887–1.249) | 1.389<br>(1.199–1.632) | 1.335<br>(1.147–1.576) | 1.086<br>(0.859–1.333) | 1.360<br>(1.221–1.521) | 1.390<br>(1.254–1.551) | 1.087<br>(1.041–1.135) | 1.041<br>(0.963–1.121) | 1.107<br>(1.079–1.136) |
| Aizu                                       | 1.134<br>(1.040–1.231) | 1.121<br>(1.064–1.181) | 1.084<br>(1.025–1.146) | 0.948<br>(0.899–0.999) | 0.984<br>(0.923–1.048) | 1.042<br>(0.986–1.099) | 1.034<br>(0.907–1.160) | 1.210<br>(1.060–1.364) | 1.280<br>(1.232–1.331) | 1.092<br>(1.018–1.171) | 1.110<br>(1.053–1.171) | 1.136<br>(1.072–1.204) |
| Iwate Prefecture vs the whole of Japan     | 1.049<br>(0.972–1.130) | 0.933<br>(0.878–0.992) | 0.937<br>(0.877–1.002) | 1.153<br>(0.940–1.442) | 1.134<br>(0.929–1.410) | 1.148<br>(0.938–1.431) | 1.147<br>(1.063–1.239) | 0.988<br>(0.907–1.076) | 1.014<br>(0.940–1.094) | 1.007<br>(0.672–1.622) | 0.921<br>(0.617–1.482) | 0.946<br>(0.634–1.518) |
| Miyagi Prefecture vs the whole of Japan    | 0.984<br>(0.876–1.104) | 0.951<br>(0.856–1.060) | 0.910<br>(0.827–1.007) | 1.094<br>(0.966–1.237) | 1.041<br>(0.939–1.159) | 1.055<br>(0.946–1.178) | 1.088<br>(0.845–1.434) | 1.044<br>(0.820–1.364) | 0.989<br>(0.778–1.293) | 0.950<br>(0.806–1.122) | 0.916<br>(0.777–1.079) | 0.885<br>(0.753–1.040) |
| Fukushima Prefecture vs the whole of Japan | 1.133<br>(1.081–1.188) | 1.151<br>(1.107–1.197) | 1.118<br>(1.080–1.158) | 1.053<br>(0.980–1.132) | 1.212<br>(1.136–1.295) | 1.203<br>(1.113–1.298) | 1.212<br>(1.082–1.344) | 1.312<br>(1.260–1.364) | 1.286<br>(1.236–1.338) | 1.084<br>(0.961–1.212) | 0.978<br>(0.897–1.064) | 0.956<br>(0.876–1.040) |
| Hamadori vs the whole of Japan             | 1.230<br>(1.099–1.365) | 1.096<br>(1.056–1.136) | 1.116<br>(1.069–1.164) | 1.008<br>(0.827–1.238) | 1.076<br>(0.898–1.305) | 1.040<br>(0.870–1.258) | 1.322<br>(0.975–1.813) | 1.338<br>(1.026–1.805) | 1.212<br>(0.932–1.637) | 1.304<br>(0.980–1.663) | 1.249<br>(1.095–1.420) | 1.309<br>(1.143–1.494) |
| Nakadori vs the whole of Japan             | 0.955<br>(0.863–1.062) | 1.048<br>(0.948–1.163) | 0.995<br>(0.900–1.105) | 1.021<br>(0.856–1.217) | 1.327<br>(1.142–1.561) | 1.288<br>(1.100–1.522) | 1.104<br>(0.870–1.355) | 1.356<br>(1.211–1.523) | 1.350<br>(1.213–1.511) | 1.036<br>(0.951–1.123) | 0.945<br>(0.847–1.048) | 0.944<br>(0.872–1.017) |
| Aizu vs the whole of Japan                 | 1.126<br>(1.025–1.231) | 1.106<br>(1.041–1.175) | 1.066<br>(0.999–1.136) | 0.921<br>(0.863–0.981) | 0.939<br>(0.877–1.004) | 1.005<br>(0.944–1.069) | 1.050<br>(0.919–1.183) | 1.207<br>(1.053–1.364) | 1.243<br>(1.181–1.306) | 1.040<br>(0.939–1.147) | 1.007<br>(0.919–1.100) | 0.969<br>(0.881–1.063) |

Table 2. Ratio of age-adjusted prevalence in three time periods to that in 2009–2010 by age groups and sex (Fukushima Prefecture vs the whole of Japan).  
Arithmetic mean (95% uncertainty interval).

| Ages and sexes                 | Hypertension              |                           |                           | Hyperlipidemia            |                           |                           | Diabetes                  |                           |                           | Mental disorders          |                           |                           |
|--------------------------------|---------------------------|---------------------------|---------------------------|---------------------------|---------------------------|---------------------------|---------------------------|---------------------------|---------------------------|---------------------------|---------------------------|---------------------------|
|                                | 2011–2013 vs<br>2009–2010 | 2014–2016 vs<br>2009–2010 | 2017–2019 vs<br>2009–2010 | 2011–2013 vs<br>2009–2010 | 2014–2016 vs<br>2009–2010 | 2017–2019 vs<br>2009–2010 | 2011–2013 vs<br>2009–2010 | 2014–2016 vs<br>2009–2010 | 2017–2019 vs<br>2009–2010 | 2011–2013 vs<br>2009–2010 | 2014–2016 vs<br>2009–2010 | 2017–2019 vs<br>2009–2010 |
| Males and females<br>(0–74 y)  | 1.133<br>(1.081–1.188)    | 1.151<br>(1.107–1.197)    | 1.118<br>(1.080–1.158)    | 1.053<br>(0.980–1.132)    | 1.212<br>(1.136–1.295)    | 1.203<br>(1.113–1.298)    | 1.212<br>(1.082–1.344)    | 1.312<br>(1.260–1.364)    | 1.286<br>(1.236–1.338)    | 1.084<br>(0.961–1.212)    | 0.978<br>(0.897–1.064)    | 0.956<br>(0.876–1.040)    |
| Males (0–74 y)                 | 1.037<br>(0.937–1.143)    | 1.013<br>(0.950–1.076)    | 0.997<br>(0.938–1.057)    | 1.067<br>(0.959–1.180)    | 1.380<br>(1.311–1.449)    | 1.363<br>(1.284–1.445)    | 1.035<br>(0.939–1.131)    | 1.099<br>(1.039–1.160)    | 1.088<br>(1.043–1.133)    | 1.015<br>(0.886–1.155)    | 0.937<br>(0.820–1.062)    | 0.948<br>(0.860–1.040)    |
| Females (0–74 y)               | 1.272<br>(1.210–1.337)    | 1.324<br>(1.237–1.415)    | 1.259<br>(1.197–1.324)    | 1.151<br>(1.036–1.283)    | 1.219<br>(1.094–1.368)    | 1.221<br>(1.091–1.372)    | 1.453<br>(1.149–1.823)    | 1.577<br>(1.311–1.919)    | 1.514<br>(1.272–1.824)    | 1.165<br>(1.074–1.260)    | 1.089<br>(1.010–1.171)    | 1.046<br>(0.970–1.123)    |
| Males and females<br>(0–39 y)  | 1.023<br>(0.888–1.182)    | 0.990<br>(0.862–1.142)    | 1.137<br>(0.978–1.320)    | 1.037<br>(0.846–1.270)    | 1.334<br>(1.129–1.587)    | 1.439<br>(1.165–1.771)    | 1.285<br>(1.217–1.357)    | 1.209<br>(1.107–1.313)    | 1.416<br>(1.256–1.582)    | 1.019<br>(0.899–1.143)    | 1.000<br>(0.872–1.137)    | 1.010<br>(0.899–1.126)    |
| Males and females<br>(40–74 y) | 1.139<br>(1.084–1.196)    | 1.160<br>(1.112–1.207)    | 1.117<br>(1.078–1.157)    | 1.053<br>(0.985–1.125)    | 1.201<br>(1.133–1.273)    | 1.182<br>(1.108–1.261)    | 1.206<br>(1.068–1.343)    | 1.320<br>(1.266–1.376)    | 1.280<br>(1.229–1.330)    | 1.137<br>(1.003–1.281)    | 0.972<br>(0.902–1.047)    | 0.928<br>(0.866–0.994)    |
| Males (0–39 y)                 | 0.945<br>(0.785–1.139)    | 0.799<br>(0.677–0.949)    | 0.947<br>(0.794–1.136)    | 0.924<br>(0.787–1.064)    | 1.227<br>(1.136–1.320)    | 1.232<br>(1.073–1.401)    | 1.044<br>(0.839–1.321)    | 1.074<br>(0.850–1.373)    | 1.214<br>(0.970–1.537)    | 1.050<br>(0.904–1.208)    | 1.021<br>(0.851–1.202)    | 1.064<br>(0.936–1.195)    |
| Males (40–74 y)                | 1.042<br>(0.939–1.146)    | 1.026<br>(0.961–1.091)    | 1.000<br>(0.939–1.061)    | 1.092<br>(0.980–1.208)    | 1.404<br>(1.326–1.482)    | 1.385<br>(1.303–1.469)    | 1.033<br>(0.933–1.136)    | 1.099<br>(1.040–1.160)    | 1.080<br>(1.035–1.126)    | 0.998<br>(0.860–1.150)    | 0.890<br>(0.796–0.997)    | 0.878<br>(0.791–0.976)    |
| Females (0–39 y)               | 1.092<br>(0.858–1.329)    | 1.195<br>(1.048–1.350)    | 1.216<br>(1.099–1.337)    | 1.222<br>(0.777–2.101)    | 1.291<br>(0.812–2.230)    | 1.505<br>(0.942–2.594)    | 1.609<br>(1.131–2.345)    | 1.327<br>(0.936–1.940)    | 1.605<br>(1.135–2.340)    | 1.009<br>(0.900–1.123)    | 1.011<br>(0.895–1.135)    | 0.994<br>(0.884–1.112)    |
| Females (40–74 y)              | 1.280<br>(1.214–1.350)    | 1.330<br>(1.237–1.428)    | 1.262<br>(1.200–1.327)    | 1.149<br>(1.055–1.257)    | 1.218<br>(1.112–1.337)    | 1.209<br>(1.103–1.330)    | 1.441<br>(1.139–1.806)    | 1.605<br>(1.347–1.924)    | 1.515<br>(1.290–1.801)    | 1.283<br>(1.199–1.371)    | 1.150<br>(1.069–1.233)    | 1.091<br>(1.037–1.144)    |

Table 3. Ratio of observed to estimated prevalence in 2020 by age groups and sex (the whole of Japan). Arithmetic mean (95% uncertainty interval).

| Ages and sexes            | Hypertension        | Hyperlipidemia      | Diabetes            | Mental disorders    |
|---------------------------|---------------------|---------------------|---------------------|---------------------|
| Males and females (0–74)  | 1.058 (1.032–1.087) | 1.075 (1.013–1.143) | 1.038 (1.012–1.066) | 1.033 (1.027–1.039) |
| Males and females (0–39)  | 1.096 (1.077–1.116) | 1.132 (0.997–1.294) | 1.042 (1.029–1.055) | 1.038 (1.028–1.048) |
| Males and females (40–74) | 1.056 (1.027–1.084) | 1.069 (1.017–1.123) | 1.038 (1.009–1.069) | 1.027 (1.018–1.037) |
| Males (0–74)              | 1.050 (1.023–1.077) | 1.076 (1.022–1.135) | 1.039 (1.015–1.065) | 1.035 (1.022–1.048) |
| Males (0–39)              | 1.098 (1.072–1.126) | 1.143 (1.009–1.309) | 1.060 (1.040–1.080) | 1.041 (1.032–1.050) |
| Males (40–74)             | 1.047 (1.017–1.079) | 1.067 (1.024–1.112) | 1.037 (1.009–1.066) | 1.027 (1.003–1.051) |
| Males (0–19)              | 1.044 (1.018–1.070) | 1.092 (0.943–1.274) | 1.041 (1.011–1.071) | 1.002 (0.989–1.016) |
| Males (20–39)             | 1.104 (1.074–1.134) | 1.146 (1.011–1.310) | 1.062 (1.039–1.084) | 1.073 (1.054–1.094) |
| Males (40–64)             | 1.062 (1.023–1.104) | 1.083 (1.029–1.143) | 1.053 (1.017–1.090) | 1.029 (1.000–1.060) |
| Males (65–74)             | 1.013 (1.002–1.025) | 1.024 (1.006–1.043) | 1.005 (0.979–1.031) | 1.013 (0.994–1.034) |
| Females (0–74)            | 1.072 (1.047–1.097) | 1.071 (1.011–1.139) | 1.036 (1.004–1.069) | 1.030 (1.022–1.039) |
| Females (0–39)            | 1.087 (1.016–1.164) | 1.094 (0.984–1.224) | 1.020 (0.975–1.069) | 1.034 (1.021–1.046) |
| Females (40–74)           | 1.071 (1.048–1.094) | 1.069 (1.013–1.129) | 1.038 (1.008–1.070) | 1.027 (1.016–1.038) |
| Females (0–19)            | 1.016 (0.935–1.108) | 1.016 (0.952–1.086) | 0.953 (0.862–1.061) | 1.009 (0.997–1.022) |
| Females (20–39)           | 1.098 (1.024–1.180) | 1.105 (0.984–1.249) | 1.031 (0.980–1.084) | 1.046 (1.029–1.062) |
| Females (40–64)           | 1.088 (1.043–1.135) | 1.090 (1.013–1.175) | 1.060 (1.007–1.117) | 1.027 (1.018–1.036) |
| Females (65–74)           | 1.046 (1.013–1.079) | 1.035 (1.003–1.067) | 1.006 (0.981–1.034) | 1.027 (1.004–1.052) |

## Supplementary Materials

Table S1. The number of diseases from 2009 to 2020 (the whole of Japan, males, and females; 0–74 years).

| Area               | Sex               | Ages | Diseases              | 2009   | 2010   | 2011   | 2012    | 2013    | 2014    | 2015    | 2016    | 2017    | 2018    | 2019    | 2020    |
|--------------------|-------------------|------|-----------------------|--------|--------|--------|---------|---------|---------|---------|---------|---------|---------|---------|---------|
| The whole of Japan | Males and females | 0–74 | Hypertension          | 35223  | 48281  | 79751  | 127912  | 157304  | 234540  | 247773  | 391114  | 525666  | 626767  | 714748  | 781664  |
| The whole of Japan | Males and females | 0–74 | Hyperlipidemia        | 39005  | 52673  | 88783  | 142425  | 173314  | 259782  | 277760  | 425027  | 559295  | 677761  | 786923  | 853000  |
| The whole of Japan | Males and females | 0–74 | Diabetes              | 21960  | 29492  | 48317  | 75415   | 91201   | 137408  | 147285  | 233631  | 314817  | 379289  | 434864  | 468609  |
| The whole of Japan | Males and females | 0–74 | Mental disorders      | 32207  | 44208  | 75891  | 112707  | 133637  | 203871  | 220154  | 334829  | 456795  | 564433  | 643366  | 677042  |
| The whole of Japan | Males and females | 0–74 | Any types of diseases | 462365 | 575117 | 989516 | 1411998 | 1641456 | 2453223 | 2589088 | 3791740 | 5065073 | 6094545 | 6815288 | 6786523 |

Table S2. Annual age-adjusted prevalence of each disease in Iwate, Miyagi, Fukushima prefectures, Hamadori, Nakadori, Aizu, and the whole of Japan.

| Area                 | Sex               | Ages | Diseases         | 2009  | 2010  | 2011  | 2012  | 2013  | 2014  | 2015  | 2016  | 2017  | 2018  | 2019  | 2020  |
|----------------------|-------------------|------|------------------|-------|-------|-------|-------|-------|-------|-------|-------|-------|-------|-------|-------|
| The whole of Japan   | Males and females | 0-74 | Hypertension     | 0.102 | 0.106 | 0.103 | 0.105 | 0.107 | 0.106 | 0.104 | 0.106 | 0.106 | 0.105 | 0.107 | 0.113 |
| Iwate Prefecture     | Males and females | 0-74 | Hypertension     | 0.119 | 0.126 | 0.125 | 0.134 | 0.129 | 0.117 | 0.116 | 0.115 | 0.114 | 0.116 | 0.120 | 0.120 |
| Miyagi Prefecture    | Males and females | 0-74 | Hypertension     | 0.128 | 0.117 | 0.114 | 0.126 | 0.124 | 0.122 | 0.120 | 0.113 | 0.111 | 0.114 | 0.115 | 0.113 |
| Fukushima Prefecture | Males and females | 0-74 | Hypertension     | 0.106 | 0.104 | 0.123 | 0.120 | 0.117 | 0.125 | 0.122 | 0.121 | 0.119 | 0.119 | 0.121 | 0.117 |
| Hamadori             | Males and females | 0-74 | Hypertension     | 0.131 | 0.130 | 0.179 | 0.152 | 0.156 | 0.144 | 0.148 | 0.144 | 0.144 | 0.151 | 0.150 | 0.142 |
| Nakadori             | Males and females | 0-74 | Hypertension     | 0.133 | 0.120 | 0.120 | 0.122 | 0.122 | 0.135 | 0.134 | 0.134 | 0.128 | 0.126 | 0.129 | 0.124 |
| Aizu                 | Males and females | 0-74 | Hypertension     | 0.112 | 0.107 | 0.117 | 0.124 | 0.131 | 0.124 | 0.122 | 0.122 | 0.121 | 0.119 | 0.116 | 0.116 |
| The whole of Japan   | Males and females | 0-74 | Hyperlipidemia   | 0.107 | 0.110 | 0.109 | 0.112 | 0.114 | 0.114 | 0.114 | 0.113 | 0.111 | 0.112 | 0.115 | 0.121 |
| Iwate Prefecture     | Males and females | 0-74 | Hyperlipidemia   | 0.100 | 0.123 | 0.125 | 0.133 | 0.136 | 0.130 | 0.131 | 0.132 | 0.128 | 0.131 | 0.135 | 0.131 |
| Miyagi Prefecture    | Males and females | 0-74 | Hyperlipidemia   | 0.115 | 0.103 | 0.115 | 0.125 | 0.127 | 0.120 | 0.119 | 0.117 | 0.115 | 0.120 | 0.121 | 0.117 |
| Fukushima Prefecture | Males and females | 0-74 | Hyperlipidemia   | 0.098 | 0.092 | 0.104 | 0.102 | 0.103 | 0.120 | 0.121 | 0.120 | 0.116 | 0.116 | 0.122 | 0.119 |
| Hamadori             | Males and females | 0-74 | Hyperlipidemia   | 0.153 | 0.128 | 0.134 | 0.155 | 0.146 | 0.162 | 0.160 | 0.150 | 0.147 | 0.150 | 0.154 | 0.150 |
| Nakadori             | Males and females | 0-74 | Hyperlipidemia   | 0.106 | 0.091 | 0.096 | 0.103 | 0.110 | 0.135 | 0.137 | 0.136 | 0.129 | 0.128 | 0.135 | 0.130 |
| Aizu                 | Males and females | 0-74 | Hyperlipidemia   | 0.121 | 0.116 | 0.112 | 0.109 | 0.116 | 0.114 | 0.114 | 0.123 | 0.126 | 0.119 | 0.126 | 0.118 |
| The whole of Japan   | Males and females | 0-74 | Diabetes         | 0.061 | 0.063 | 0.061 | 0.061 | 0.062 | 0.062 | 0.062 | 0.064 | 0.064 | 0.064 | 0.065 | 0.068 |
| Iwate Prefecture     | Males and females | 0-74 | Diabetes         | 0.059 | 0.055 | 0.066 | 0.065 | 0.064 | 0.055 | 0.056 | 0.059 | 0.060 | 0.060 | 0.060 | 0.060 |
| Miyagi Prefecture    | Males and females | 0-74 | Diabetes         | 0.076 | 0.059 | 0.066 | 0.071 | 0.076 | 0.070 | 0.070 | 0.067 | 0.066 | 0.068 | 0.068 | 0.065 |
| Fukushima Prefecture | Males and females | 0-74 | Diabetes         | 0.044 | 0.043 | 0.047 | 0.052 | 0.056 | 0.057 | 0.057 | 0.057 | 0.057 | 0.057 | 0.058 | 0.056 |
| Hamadori             | Males and females | 0-74 | Diabetes         | 0.051 | 0.067 | 0.065 | 0.080 | 0.081 | 0.080 | 0.078 | 0.075 | 0.072 | 0.074 | 0.070 | 0.070 |
| Nakadori             | Males and females | 0-74 | Diabetes         | 0.047 | 0.043 | 0.042 | 0.047 | 0.058 | 0.059 | 0.063 | 0.061 | 0.062 | 0.062 | 0.064 | 0.060 |
| Aizu                 | Males and females | 0-74 | Diabetes         | 0.049 | 0.048 | 0.044 | 0.051 | 0.054 | 0.055 | 0.054 | 0.066 | 0.062 | 0.060 | 0.063 | 0.064 |
| The whole of Japan   | Males and females | 0-74 | Mental disorders | 0.075 | 0.081 | 0.080 | 0.082 | 0.083 | 0.084 | 0.086 | 0.088 | 0.089 | 0.091 | 0.093 | 0.098 |



|                      |                   |       |                  |       |       |       |       |       |       |       |       |       |       |       |       |
|----------------------|-------------------|-------|------------------|-------|-------|-------|-------|-------|-------|-------|-------|-------|-------|-------|-------|
| Iwate Prefecture     | Males and females | 0-74  | Mental disorders | 0.057 | 0.086 | 0.077 | 0.068 | 0.069 | 0.067 | 0.068 | 0.071 | 0.072 | 0.077 | 0.077 | 0.078 |
| Miyagi Prefecture    | Males and females | 0-74  | Mental disorders | 0.073 | 0.084 | 0.075 | 0.077 | 0.081 | 0.077 | 0.078 | 0.081 | 0.080 | 0.081 | 0.081 | 0.081 |
| Fukushima Prefecture | Males and females | 0-74  | Mental disorders | 0.072 | 0.075 | 0.090 | 0.081 | 0.078 | 0.077 | 0.078 | 0.080 | 0.081 | 0.083 | 0.082 | 0.082 |
| Hamadori             | Males and females | 0-74  | Mental disorders | 0.064 | 0.069 | 0.114 | 0.083 | 0.078 | 0.097 | 0.085 | 0.094 | 0.095 | 0.110 | 0.103 | 0.101 |
| Nakadori             | Males and females | 0-74  | Mental disorders | 0.088 | 0.086 | 0.097 | 0.096 | 0.091 | 0.087 | 0.087 | 0.097 | 0.098 | 0.096 | 0.096 | 0.095 |
| Aizu                 | Males and females | 0-74  | Mental disorders | 0.081 | 0.085 | 0.094 | 0.087 | 0.091 | 0.091 | 0.094 | 0.092 | 0.097 | 0.092 | 0.094 | 0.087 |
| The whole of Japan   | Males and females | 0-39  | Hypertension     | 0.010 | 0.010 | 0.009 | 0.010 | 0.010 | 0.010 | 0.010 | 0.010 | 0.010 | 0.010 | 0.010 | 0.011 |
| Fukushima Prefecture | Males and females | 0-39  | Hypertension     | 0.010 | 0.008 | 0.009 | 0.009 | 0.009 | 0.009 | 0.008 | 0.009 | 0.009 | 0.010 | 0.011 | 0.010 |
| The whole of Japan   | Males and females | 0-39  | Hyperlipidemia   | 0.019 | 0.018 | 0.018 | 0.019 | 0.019 | 0.019 | 0.020 | 0.019 | 0.019 | 0.019 | 0.021 | 0.023 |
| Fukushima Prefecture | Males and females | 0-39  | Hyperlipidemia   | 0.014 | 0.012 | 0.012 | 0.015 | 0.014 | 0.018 | 0.017 | 0.019 | 0.018 | 0.019 | 0.022 | 0.022 |
| The whole of Japan   | Males and females | 0-39  | Diabetes         | 0.009 | 0.009 | 0.009 | 0.009 | 0.009 | 0.009 | 0.009 | 0.010 | 0.010 | 0.011 | 0.011 | 0.012 |
| Fukushima Prefecture | Males and females | 0-39  | Diabetes         | 0.005 | 0.005 | 0.006 | 0.006 | 0.006 | 0.006 | 0.005 | 0.006 | 0.007 | 0.008 | 0.008 | 0.009 |
| The whole of Japan   | Males and females | 0-39  | Mental disorders | 0.054 | 0.060 | 0.061 | 0.063 | 0.064 | 0.066 | 0.068 | 0.071 | 0.073 | 0.077 | 0.080 | 0.086 |
| Fukushima Prefecture | Males and females | 0-39  | Mental disorders | 0.048 | 0.049 | 0.057 | 0.052 | 0.053 | 0.054 | 0.058 | 0.062 | 0.064 | 0.067 | 0.066 | 0.068 |
| The whole of Japan   | Males and females | 40-74 | Hypertension     | 0.244 | 0.252 | 0.246 | 0.250 | 0.255 | 0.253 | 0.249 | 0.254 | 0.252 | 0.251 | 0.254 | 0.268 |
| Fukushima Prefecture | Males and females | 40-74 | Hypertension     | 0.253 | 0.251 | 0.297 | 0.289 | 0.282 | 0.302 | 0.296 | 0.292 | 0.286 | 0.286 | 0.288 | 0.282 |
| The whole of Japan   | Males and females | 40-74 | Hyperlipidemia   | 0.242 | 0.249 | 0.247 | 0.255 | 0.259 | 0.258 | 0.258 | 0.256 | 0.251 | 0.252 | 0.259 | 0.272 |
| Fukushima Prefecture | Males and females | 40-74 | Hyperlipidemia   | 0.225 | 0.214 | 0.244 | 0.235 | 0.238 | 0.277 | 0.278 | 0.273 | 0.265 | 0.265 | 0.275 | 0.268 |
| The whole of Japan   | Males and females | 40-74 | Diabetes         | 0.141 | 0.145 | 0.141 | 0.141 | 0.142 | 0.142 | 0.142 | 0.146 | 0.145 | 0.145 | 0.147 | 0.154 |
| Fukushima Prefecture | Males and females | 40-74 | Diabetes         | 0.103 | 0.101 | 0.110 | 0.121 | 0.133 | 0.136 | 0.135 | 0.134 | 0.132 | 0.133 | 0.134 | 0.129 |
| The whole of Japan   | Males and females | 40-74 | Mental disorders | 0.107 | 0.112 | 0.110 | 0.111 | 0.110 | 0.111 | 0.113 | 0.113 | 0.113 | 0.113 | 0.113 | 0.117 |
| Fukushima Prefecture | Males and females | 40-74 | Mental disorders | 0.108 | 0.113 | 0.140 | 0.126 | 0.117 | 0.114 | 0.109 | 0.108 | 0.106 | 0.107 | 0.106 | 0.103 |
| The whole of Japan   | Males             | 0-74  | Hypertension     | 0.114 | 0.120 | 0.117 | 0.120 | 0.124 | 0.125 | 0.124 | 0.128 | 0.128 | 0.129 | 0.131 | 0.139 |
| Fukushima Prefecture | Males             | 0-74  | Hypertension     | 0.126 | 0.122 | 0.142 | 0.129 | 0.127 | 0.136 | 0.134 | 0.135 | 0.136 | 0.137 | 0.138 | 0.135 |

|                      |         |       |                  |       |       |       |       |       |       |       |       |       |       |       |       |
|----------------------|---------|-------|------------------|-------|-------|-------|-------|-------|-------|-------|-------|-------|-------|-------|-------|
| The whole of Japan   | Males   | 0-74  | Hyperlipidemia   | 0.109 | 0.113 | 0.114 | 0.121 | 0.125 | 0.125 | 0.126 | 0.126 | 0.125 | 0.127 | 0.131 | 0.140 |
| Fukushima Prefecture | Males   | 0-74  | Hyperlipidemia   | 0.081 | 0.081 | 0.086 | 0.096 | 0.099 | 0.123 | 0.127 | 0.129 | 0.125 | 0.125 | 0.131 | 0.129 |
| The whole of Japan   | Males   | 0-74  | Diabetes         | 0.073 | 0.076 | 0.072 | 0.072 | 0.073 | 0.073 | 0.074 | 0.077 | 0.077 | 0.078 | 0.079 | 0.084 |
| Fukushima Prefecture | Males   | 0-74  | Diabetes         | 0.059 | 0.059 | 0.055 | 0.059 | 0.064 | 0.063 | 0.066 | 0.066 | 0.067 | 0.067 | 0.067 | 0.065 |
| The whole of Japan   | Males   | 0-74  | Mental disorders | 0.071 | 0.076 | 0.077 | 0.079 | 0.079 | 0.081 | 0.084 | 0.086 | 0.088 | 0.090 | 0.091 | 0.097 |
| Fukushima Prefecture | Males   | 0-74  | Mental disorders | 0.063 | 0.066 | 0.077 | 0.066 | 0.067 | 0.063 | 0.071 | 0.073 | 0.074 | 0.076 | 0.074 | 0.074 |
| The whole of Japan   | Males   | 0-39  | Hypertension     | 0.013 | 0.013 | 0.012 | 0.012 | 0.012 | 0.012 | 0.012 | 0.012 | 0.012 | 0.013 | 0.013 | 0.014 |
| Fukushima Prefecture | Males   | 0-39  | Hypertension     | 0.014 | 0.012 | 0.013 | 0.012 | 0.011 | 0.010 | 0.010 | 0.010 | 0.011 | 0.012 | 0.013 | 0.012 |
| The whole of Japan   | Males   | 0-39  | Hyperlipidemia   | 0.024 | 0.024 | 0.022 | 0.024 | 0.024 | 0.024 | 0.025 | 0.024 | 0.024 | 0.025 | 0.027 | 0.030 |
| Fukushima Prefecture | Males   | 0-39  | Hyperlipidemia   | 0.019 | 0.019 | 0.015 | 0.019 | 0.019 | 0.023 | 0.023 | 0.026 | 0.023 | 0.024 | 0.027 | 0.028 |
| The whole of Japan   | Males   | 0-39  | Diabetes         | 0.011 | 0.011 | 0.010 | 0.010 | 0.010 | 0.010 | 0.010 | 0.011 | 0.011 | 0.012 | 0.012 | 0.013 |
| Fukushima Prefecture | Males   | 0-39  | Diabetes         | 0.006 | 0.007 | 0.006 | 0.005 | 0.006 | 0.006 | 0.006 | 0.007 | 0.007 | 0.008 | 0.009 | 0.009 |
| The whole of Japan   | Males   | 0-39  | Mental disorders | 0.056 | 0.062 | 0.064 | 0.066 | 0.068 | 0.070 | 0.073 | 0.076 | 0.078 | 0.082 | 0.084 | 0.091 |
| Fukushima Prefecture | Males   | 0-39  | Mental disorders | 0.045 | 0.044 | 0.056 | 0.049 | 0.051 | 0.049 | 0.057 | 0.061 | 0.063 | 0.067 | 0.065 | 0.067 |
| The whole of Japan   | Males   | 40-74 | Hypertension     | 0.267 | 0.283 | 0.277 | 0.284 | 0.295 | 0.296 | 0.295 | 0.304 | 0.305 | 0.306 | 0.311 | 0.329 |
| Fukushima Prefecture | Males   | 40-74 | Hypertension     | 0.297 | 0.290 | 0.339 | 0.307 | 0.304 | 0.328 | 0.324 | 0.327 | 0.327 | 0.328 | 0.329 | 0.323 |
| The whole of Japan   | Males   | 40-74 | Hyperlipidemia   | 0.238 | 0.251 | 0.255 | 0.270 | 0.278 | 0.278 | 0.281 | 0.281 | 0.279 | 0.283 | 0.290 | 0.308 |
| Fukushima Prefecture | Males   | 40-74 | Hyperlipidemia   | 0.176 | 0.176 | 0.195 | 0.213 | 0.221 | 0.277 | 0.286 | 0.286 | 0.282 | 0.279 | 0.289 | 0.282 |
| The whole of Japan   | Males   | 40-74 | Diabetes         | 0.168 | 0.176 | 0.168 | 0.168 | 0.169 | 0.171 | 0.172 | 0.177 | 0.178 | 0.179 | 0.181 | 0.190 |
| Fukushima Prefecture | Males   | 40-74 | Diabetes         | 0.140 | 0.140 | 0.131 | 0.140 | 0.153 | 0.150 | 0.157 | 0.157 | 0.158 | 0.157 | 0.157 | 0.151 |
| The whole of Japan   | Males   | 40-74 | Mental disorders | 0.093 | 0.098 | 0.097 | 0.099 | 0.097 | 0.098 | 0.100 | 0.102 | 0.102 | 0.102 | 0.102 | 0.105 |
| Fukushima Prefecture | Males   | 40-74 | Mental disorders | 0.091 | 0.100 | 0.108 | 0.094 | 0.091 | 0.085 | 0.091 | 0.091 | 0.092 | 0.090 | 0.087 | 0.085 |
| The whole of Japan   | Females | 0-74  | Hypertension     | 0.087 | 0.089 | 0.086 | 0.086 | 0.086 | 0.084 | 0.082 | 0.082 | 0.081 | 0.079 | 0.080 | 0.084 |
| Fukushima Prefecture | Females | 0-74  | Hypertension     | 0.088 | 0.084 | 0.107 | 0.108 | 0.106 | 0.111 | 0.108 | 0.103 | 0.098 | 0.099 | 0.099 | 0.096 |

|                      |         |       |                  |       |       |       |       |       |       |       |       |       |       |       |       |
|----------------------|---------|-------|------------------|-------|-------|-------|-------|-------|-------|-------|-------|-------|-------|-------|-------|
| The whole of Japan   | Females | 0-74  | Hyperlipidemia   | 0.101 | 0.103 | 0.100 | 0.101 | 0.101 | 0.100 | 0.099 | 0.099 | 0.095 | 0.095 | 0.097 | 0.102 |
| Fukushima Prefecture | Females | 0-74  | Hyperlipidemia   | 0.097 | 0.087 | 0.105 | 0.104 | 0.103 | 0.112 | 0.108 | 0.106 | 0.103 | 0.104 | 0.109 | 0.107 |
| The whole of Japan   | Females | 0-74  | Diabetes         | 0.048 | 0.049 | 0.048 | 0.048 | 0.048 | 0.048 | 0.048 | 0.049 | 0.048 | 0.049 | 0.049 | 0.051 |
| Fukushima Prefecture | Females | 0-74  | Diabetes         | 0.033 | 0.027 | 0.037 | 0.044 | 0.049 | 0.050 | 0.046 | 0.045 | 0.044 | 0.046 | 0.047 | 0.046 |
| The whole of Japan   | Females | 0-74  | Mental disorders | 0.080 | 0.084 | 0.084 | 0.085 | 0.087 | 0.087 | 0.088 | 0.090 | 0.091 | 0.093 | 0.095 | 0.100 |
| Fukushima Prefecture | Females | 0-74  | Mental disorders | 0.074 | 0.076 | 0.093 | 0.093 | 0.087 | 0.091 | 0.086 | 0.089 | 0.087 | 0.091 | 0.091 | 0.091 |
| The whole of Japan   | Females | 0-39  | Hypertension     | 0.006 | 0.006 | 0.006 | 0.007 | 0.007 | 0.007 | 0.007 | 0.007 | 0.007 | 0.007 | 0.007 | 0.008 |
| Fukushima Prefecture | Females | 0-39  | Hypertension     | 0.006 | 0.006 | 0.006 | 0.006 | 0.008 | 0.007 | 0.007 | 0.009 | 0.007 | 0.008 | 0.008 | 0.007 |
| The whole of Japan   | Females | 0-39  | Hyperlipidemia   | 0.013 | 0.013 | 0.012 | 0.013 | 0.013 | 0.013 | 0.013 | 0.014 | 0.013 | 0.013 | 0.014 | 0.015 |
| Fukushima Prefecture | Females | 0-39  | Hyperlipidemia   | 0.011 | 0.007 | 0.010 | 0.011 | 0.009 | 0.013 | 0.011 | 0.010 | 0.012 | 0.013 | 0.015 | 0.015 |
| The whole of Japan   | Females | 0-39  | Diabetes         | 0.008 | 0.008 | 0.008 | 0.008 | 0.008 | 0.008 | 0.009 | 0.009 | 0.009 | 0.009 | 0.010 | 0.010 |
| Fukushima Prefecture | Females | 0-39  | Diabetes         | 0.004 | 0.003 | 0.005 | 0.007 | 0.006 | 0.006 | 0.005 | 0.005 | 0.006 | 0.007 | 0.008 | 0.009 |
| The whole of Japan   | Females | 0-39  | Mental disorders | 0.053 | 0.057 | 0.057 | 0.059 | 0.061 | 0.062 | 0.063 | 0.066 | 0.068 | 0.072 | 0.075 | 0.080 |
| Fukushima Prefecture | Females | 0-39  | Mental disorders | 0.051 | 0.054 | 0.058 | 0.056 | 0.055 | 0.059 | 0.059 | 0.063 | 0.066 | 0.069 | 0.067 | 0.069 |
| The whole of Japan   | Females | 40-74 | Hypertension     | 0.210 | 0.215 | 0.208 | 0.208 | 0.206 | 0.202 | 0.196 | 0.196 | 0.193 | 0.190 | 0.191 | 0.202 |
| Fukushima Prefecture | Females | 40-74 | Hypertension     | 0.213 | 0.204 | 0.262 | 0.265 | 0.256 | 0.269 | 0.261 | 0.247 | 0.237 | 0.237 | 0.238 | 0.232 |
| The whole of Japan   | Females | 40-74 | Hyperlipidemia   | 0.236 | 0.240 | 0.234 | 0.235 | 0.235 | 0.233 | 0.229 | 0.229 | 0.221 | 0.220 | 0.224 | 0.234 |
| Fukushima Prefecture | Females | 40-74 | Hyperlipidemia   | 0.228 | 0.209 | 0.250 | 0.245 | 0.246 | 0.263 | 0.257 | 0.251 | 0.241 | 0.242 | 0.253 | 0.248 |
| The whole of Japan   | Females | 40-74 | Diabetes         | 0.109 | 0.112 | 0.110 | 0.109 | 0.110 | 0.109 | 0.108 | 0.110 | 0.108 | 0.108 | 0.110 | 0.113 |
| Fukushima Prefecture | Females | 40-74 | Diabetes         | 0.076 | 0.065 | 0.086 | 0.101 | 0.114 | 0.117 | 0.109 | 0.105 | 0.102 | 0.105 | 0.106 | 0.102 |
| The whole of Japan   | Females | 40-74 | Mental disorders | 0.120 | 0.125 | 0.123 | 0.126 | 0.126 | 0.126 | 0.127 | 0.127 | 0.126 | 0.126 | 0.127 | 0.130 |
| Fukushima Prefecture | Females | 40-74 | Mental disorders | 0.110 | 0.111 | 0.146 | 0.150 | 0.138 | 0.139 | 0.127 | 0.127 | 0.121 | 0.126 | 0.127 | 0.123 |

Table S3. Annual age-adjusted prevalence of each disease in the whole of Japan by age groups and sex and 47 prefectures (males, 0–39 years) from 2015 to 2020.

| Area               | Sex               | Ages  | Diseases       | 2015  | 2016  | 2017  | 2018  | 2019  | 2020  |
|--------------------|-------------------|-------|----------------|-------|-------|-------|-------|-------|-------|
| The whole of Japan | Males and females | 0–39  | Hypertension   | 0.010 | 0.010 | 0.010 | 0.010 | 0.010 | 0.011 |
| The whole of Japan | Males and females | 40–74 | Hypertension   | 0.249 | 0.254 | 0.252 | 0.251 | 0.254 | 0.268 |
| The whole of Japan | Males and females | 0–74  | Hypertension   | 0.104 | 0.106 | 0.106 | 0.105 | 0.107 | 0.113 |
| The whole of Japan | Males             | 0–39  | Hypertension   | 0.012 | 0.012 | 0.012 | 0.013 | 0.013 | 0.014 |
| The whole of Japan | Males             | 40–74 | Hypertension   | 0.295 | 0.304 | 0.305 | 0.306 | 0.311 | 0.329 |
| The whole of Japan | Males             | 0–74  | Hypertension   | 0.124 | 0.128 | 0.128 | 0.129 | 0.131 | 0.139 |
| The whole of Japan | Males             | 0–19  | Hypertension   | 0.002 | 0.002 | 0.002 | 0.002 | 0.002 | 0.003 |
| The whole of Japan | Males             | 20–39 | Hypertension   | 0.021 | 0.021 | 0.022 | 0.022 | 0.022 | 0.025 |
| The whole of Japan | Males             | 40–64 | Hypertension   | 0.245 | 0.254 | 0.255 | 0.255 | 0.259 | 0.278 |
| The whole of Japan | Males             | 65–74 | Hypertension   | 0.529 | 0.539 | 0.545 | 0.548 | 0.555 | 0.568 |
| The whole of Japan | Females           | 0–39  | Hypertension   | 0.007 | 0.007 | 0.007 | 0.007 | 0.007 | 0.008 |
| The whole of Japan | Females           | 40–74 | Hypertension   | 0.196 | 0.196 | 0.193 | 0.190 | 0.191 | 0.202 |
| The whole of Japan | Females           | 0–74  | Hypertension   | 0.082 | 0.082 | 0.081 | 0.079 | 0.080 | 0.084 |
| The whole of Japan | Females           | 0–19  | Hypertension   | 0.001 | 0.002 | 0.002 | 0.002 | 0.002 | 0.002 |
| The whole of Japan | Females           | 20–39 | Hypertension   | 0.012 | 0.012 | 0.012 | 0.012 | 0.012 | 0.013 |
| The whole of Japan | Females           | 40–64 | Hypertension   | 0.136 | 0.139 | 0.137 | 0.135 | 0.137 | 0.148 |
| The whole of Japan | Females           | 65–74 | Hypertension   | 0.481 | 0.466 | 0.457 | 0.452 | 0.448 | 0.457 |
| The whole of Japan | Males and females | 0–39  | Hyperlipidemia | 0.020 | 0.019 | 0.019 | 0.019 | 0.021 | 0.023 |
| The whole of Japan | Males and females | 40–74 | Hyperlipidemia | 0.258 | 0.256 | 0.251 | 0.252 | 0.259 | 0.272 |
| The whole of Japan | Males and females | 0–74  | Hyperlipidemia | 0.114 | 0.113 | 0.111 | 0.112 | 0.115 | 0.121 |
| The whole of Japan | Males             | 0–39  | Hyperlipidemia | 0.025 | 0.024 | 0.024 | 0.025 | 0.027 | 0.030 |

|                    |                   |       |                |       |       |       |       |       |       |
|--------------------|-------------------|-------|----------------|-------|-------|-------|-------|-------|-------|
| The whole of Japan | Males             | 40–74 | Hyperlipidemia | 0.281 | 0.281 | 0.279 | 0.283 | 0.290 | 0.308 |
| The whole of Japan | Males             | 0–74  | Hyperlipidemia | 0.126 | 0.126 | 0.125 | 0.127 | 0.131 | 0.140 |
| The whole of Japan | Males             | 0–19  | Hyperlipidemia | 0.003 | 0.003 | 0.003 | 0.003 | 0.003 | 0.004 |
| The whole of Japan | Males             | 20–39 | Hyperlipidemia | 0.045 | 0.044 | 0.043 | 0.046 | 0.049 | 0.055 |
| The whole of Japan | Males             | 40–64 | Hyperlipidemia | 0.252 | 0.252 | 0.247 | 0.251 | 0.258 | 0.277 |
| The whole of Japan | Males             | 65–74 | Hyperlipidemia | 0.420 | 0.421 | 0.427 | 0.434 | 0.441 | 0.456 |
| The whole of Japan | Females           | 0–39  | Hyperlipidemia | 0.013 | 0.014 | 0.013 | 0.013 | 0.014 | 0.015 |
| The whole of Japan | Females           | 40–74 | Hyperlipidemia | 0.229 | 0.229 | 0.221 | 0.220 | 0.224 | 0.234 |
| The whole of Japan | Females           | 0–74  | Hyperlipidemia | 0.099 | 0.099 | 0.095 | 0.095 | 0.097 | 0.102 |
| The whole of Japan | Females           | 0–19  | Hyperlipidemia | 0.003 | 0.003 | 0.003 | 0.003 | 0.003 | 0.003 |
| The whole of Japan | Females           | 20–39 | Hyperlipidemia | 0.023 | 0.023 | 0.022 | 0.023 | 0.025 | 0.027 |
| The whole of Japan | Females           | 40–64 | Hyperlipidemia | 0.171 | 0.172 | 0.165 | 0.164 | 0.169 | 0.179 |
| The whole of Japan | Females           | 65–74 | Hyperlipidemia | 0.506 | 0.496 | 0.486 | 0.484 | 0.484 | 0.491 |
| The whole of Japan | Males and females | 0–39  | Diabetes       | 0.009 | 0.010 | 0.010 | 0.011 | 0.011 | 0.012 |
| The whole of Japan | Males and females | 40–74 | Diabetes       | 0.142 | 0.146 | 0.145 | 0.145 | 0.147 | 0.154 |
| The whole of Japan | Males and females | 0–74  | Diabetes       | 0.062 | 0.064 | 0.064 | 0.064 | 0.065 | 0.068 |
| The whole of Japan | Males             | 0–39  | Diabetes       | 0.010 | 0.011 | 0.011 | 0.012 | 0.012 | 0.013 |
| The whole of Japan | Males             | 40–74 | Diabetes       | 0.172 | 0.177 | 0.178 | 0.179 | 0.181 | 0.190 |
| The whole of Japan | Males             | 0–74  | Diabetes       | 0.074 | 0.077 | 0.077 | 0.078 | 0.079 | 0.084 |
| The whole of Japan | Males             | 0–19  | Diabetes       | 0.002 | 0.002 | 0.002 | 0.002 | 0.002 | 0.003 |
| The whole of Japan | Males             | 20–39 | Diabetes       | 0.018 | 0.018 | 0.019 | 0.020 | 0.021 | 0.024 |
| The whole of Japan | Males             | 40–64 | Diabetes       | 0.141 | 0.146 | 0.146 | 0.147 | 0.150 | 0.160 |
| The whole of Japan | Males             | 65–74 | Diabetes       | 0.318 | 0.323 | 0.330 | 0.328 | 0.331 | 0.337 |
| The whole of Japan | Females           | 0–39  | Diabetes       | 0.009 | 0.009 | 0.009 | 0.009 | 0.010 | 0.010 |

|                     |                   |       |                  |       |       |       |       |       |       |
|---------------------|-------------------|-------|------------------|-------|-------|-------|-------|-------|-------|
| The whole of Japan  | Females           | 40–74 | Diabetes         | 0.108 | 0.110 | 0.108 | 0.108 | 0.110 | 0.113 |
| The whole of Japan  | Females           | 0–74  | Diabetes         | 0.048 | 0.049 | 0.048 | 0.049 | 0.049 | 0.051 |
| The whole of Japan  | Females           | 0–19  | Diabetes         | 0.002 | 0.002 | 0.002 | 0.002 | 0.003 | 0.003 |
| The whole of Japan  | Females           | 20–39 | Diabetes         | 0.015 | 0.016 | 0.016 | 0.016 | 0.017 | 0.017 |
| The whole of Japan  | Females           | 40–64 | Diabetes         | 0.076 | 0.079 | 0.078 | 0.077 | 0.079 | 0.084 |
| The whole of Japan  | Females           | 65–74 | Diabetes         | 0.257 | 0.254 | 0.251 | 0.254 | 0.252 | 0.252 |
| The whole of Japan  | Males and females | 0–39  | Mental disorders | 0.068 | 0.071 | 0.073 | 0.077 | 0.080 | 0.086 |
| The whole of Japan  | Males and females | 40–74 | Mental disorders | 0.113 | 0.113 | 0.113 | 0.113 | 0.113 | 0.117 |
| The whole of Japan  | Males and females | 0–74  | Mental disorders | 0.086 | 0.088 | 0.089 | 0.091 | 0.093 | 0.098 |
| The whole of Japan  | Males             | 0–39  | Mental disorders | 0.073 | 0.076 | 0.078 | 0.082 | 0.084 | 0.091 |
| The whole of Japan  | Males             | 40–74 | Mental disorders | 0.100 | 0.102 | 0.102 | 0.102 | 0.102 | 0.105 |
| The whole of Japan  | Males             | 0–74  | Mental disorders | 0.084 | 0.086 | 0.088 | 0.090 | 0.091 | 0.097 |
| The whole of Japan  | Males             | 0–19  | Mental disorders | 0.064 | 0.067 | 0.071 | 0.075 | 0.079 | 0.083 |
| The whole of Japan  | Males             | 20–39 | Mental disorders | 0.081 | 0.084 | 0.085 | 0.088 | 0.089 | 0.098 |
| The whole of Japan  | Males             | 40–64 | Mental disorders | 0.101 | 0.104 | 0.104 | 0.105 | 0.104 | 0.109 |
| The whole of Japan  | Males             | 65–74 | Mental disorders | 0.095 | 0.092 | 0.092 | 0.090 | 0.088 | 0.088 |
| The whole of Japan  | Females           | 0–39  | Mental disorders | 0.063 | 0.066 | 0.068 | 0.072 | 0.075 | 0.080 |
| The whole of Japan  | Females           | 40–74 | Mental disorders | 0.127 | 0.127 | 0.126 | 0.126 | 0.127 | 0.130 |
| The whole of Japan  | Females           | 0–74  | Mental disorders | 0.088 | 0.090 | 0.091 | 0.093 | 0.095 | 0.100 |
| The whole of Japan  | Females           | 0–19  | Mental disorders | 0.040 | 0.042 | 0.045 | 0.048 | 0.050 | 0.053 |
| The whole of Japan  | Females           | 20–39 | Mental disorders | 0.085 | 0.088 | 0.090 | 0.094 | 0.098 | 0.106 |
| The whole of Japan  | Females           | 40–64 | Mental disorders | 0.117 | 0.119 | 0.119 | 0.120 | 0.122 | 0.126 |
| The whole of Japan  | Females           | 65–74 | Mental disorders | 0.171 | 0.167 | 0.160 | 0.153 | 0.148 | 0.146 |
| Hokkaido Prefecture | Males             | 0–39  | Hypertension     | 0.009 | 0.011 | 0.011 | 0.012 | 0.012 | 0.012 |

|                               |       |      |              |       |       |       |       |       |       |
|-------------------------------|-------|------|--------------|-------|-------|-------|-------|-------|-------|
| Aomori Prefecture             | Males | 0-39 | Hypertension | 0.014 | 0.011 | 0.011 | 0.011 | 0.011 | 0.013 |
| Iwate Prefecture              | Males | 0-39 | Hypertension | 0.012 | 0.011 | 0.010 | 0.012 | 0.013 | 0.013 |
| Miyagi Prefecture             | Males | 0-39 | Hypertension | 0.012 | 0.012 | 0.011 | 0.012 | 0.012 | 0.012 |
| Akita Prefecture              | Males | 0-39 | Hypertension | 0.015 | 0.011 | 0.010 | 0.012 | 0.013 | 0.012 |
| Yamagata Prefecture           | Males | 0-39 | Hypertension | 0.011 | 0.011 | 0.015 | 0.016 | 0.017 | 0.015 |
| Fukushima Prefecture          | Males | 0-39 | Hypertension | 0.010 | 0.010 | 0.011 | 0.012 | 0.013 | 0.012 |
| Ibaraki Prefecture            | Males | 0-39 | Hypertension | 0.010 | 0.010 | 0.010 | 0.010 | 0.011 | 0.012 |
| Tochigi Prefecture            | Males | 0-39 | Hypertension | 0.011 | 0.012 | 0.012 | 0.014 | 0.013 | 0.013 |
| Gunma Prefecture              | Males | 0-39 | Hypertension | 0.012 | 0.010 | 0.009 | 0.010 | 0.010 | 0.011 |
| Saitama Prefecture            | Males | 0-39 | Hypertension | 0.008 | 0.008 | 0.008 | 0.008 | 0.008 | 0.009 |
| Chiba Prefecture              | Males | 0-39 | Hypertension | 0.009 | 0.009 | 0.009 | 0.010 | 0.009 | 0.009 |
| Tokyo Metropolitan Government | Males | 0-39 | Hypertension | 0.009 | 0.009 | 0.008 | 0.009 | 0.009 | 0.009 |
| Kanagawa Prefecture           | Males | 0-39 | Hypertension | 0.009 | 0.008 | 0.009 | 0.009 | 0.009 | 0.009 |
| Niigata Prefecture            | Males | 0-39 | Hypertension | 0.007 | 0.008 | 0.008 | 0.010 | 0.011 | 0.013 |
| Toyama Prefecture             | Males | 0-39 | Hypertension | 0.012 | 0.010 | 0.012 | 0.012 | 0.011 | 0.013 |
| Ishikawa Prefecture           | Males | 0-39 | Hypertension | 0.010 | 0.011 | 0.011 | 0.010 | 0.011 | 0.012 |
| Fukui Prefecture              | Males | 0-39 | Hypertension | 0.009 | 0.008 | 0.008 | 0.010 | 0.011 | 0.013 |
| Yamanashi Prefecture          | Males | 0-39 | Hypertension | 0.008 | 0.010 | 0.008 | 0.008 | 0.009 | 0.009 |
| Nagano Prefecture             | Males | 0-39 | Hypertension | 0.011 | 0.012 | 0.011 | 0.012 | 0.012 | 0.012 |
| Gifu Prefecture               | Males | 0-39 | Hypertension | 0.008 | 0.008 | 0.007 | 0.008 | 0.008 | 0.008 |
| Shizuoka Prefecture           | Males | 0-39 | Hypertension | 0.010 | 0.010 | 0.010 | 0.010 | 0.010 | 0.010 |
| Aichi Prefecture              | Males | 0-39 | Hypertension | 0.009 | 0.009 | 0.009 | 0.009 | 0.010 | 0.009 |
| Mie Prefecture                | Males | 0-39 | Hypertension | 0.008 | 0.008 | 0.008 | 0.009 | 0.008 | 0.009 |
| Shiga Prefecture              | Males | 0-39 | Hypertension | 0.011 | 0.008 | 0.009 | 0.009 | 0.009 | 0.010 |

|                      |       |      |                |       |       |       |       |       |       |
|----------------------|-------|------|----------------|-------|-------|-------|-------|-------|-------|
| Kyoto Prefecture     | Males | 0–39 | Hypertension   | 0.008 | 0.008 | 0.007 | 0.007 | 0.008 | 0.008 |
| Osaka Prefecture     | Males | 0–39 | Hypertension   | 0.010 | 0.010 | 0.009 | 0.009 | 0.009 | 0.009 |
| Hyogo Prefecture     | Males | 0–39 | Hypertension   | 0.008 | 0.007 | 0.008 | 0.007 | 0.008 | 0.008 |
| Nara Prefecture      | Males | 0–39 | Hypertension   | 0.007 | 0.008 | 0.008 | 0.009 | 0.007 | 0.008 |
| Wakayama Prefecture  | Males | 0–39 | Hypertension   | 0.008 | 0.006 | 0.009 | 0.008 | 0.010 | 0.009 |
| Tottori Prefecture   | Males | 0–39 | Hypertension   | 0.010 | 0.008 | 0.007 | 0.009 | 0.009 | 0.011 |
| Shimane Prefecture   | Males | 0–39 | Hypertension   | 0.004 | 0.010 | 0.008 | 0.012 | 0.012 | 0.012 |
| Okayama Prefecture   | Males | 0–39 | Hypertension   | 0.009 | 0.009 | 0.009 | 0.009 | 0.010 | 0.010 |
| Hiroshima Prefecture | Males | 0–39 | Hypertension   | 0.009 | 0.009 | 0.008 | 0.009 | 0.009 | 0.009 |
| Yamaguchi Prefecture | Males | 0–39 | Hypertension   | 0.008 | 0.008 | 0.008 | 0.008 | 0.008 | 0.010 |
| Tokushima Prefecture | Males | 0–39 | Hypertension   | 0.006 | 0.013 | 0.008 | 0.008 | 0.009 | 0.010 |
| Kagawa Prefecture    | Males | 0–39 | Hypertension   | 0.010 | 0.010 | 0.009 | 0.010 | 0.010 | 0.010 |
| Ehime Prefecture     | Males | 0–39 | Hypertension   | 0.007 | 0.008 | 0.007 | 0.009 | 0.008 | 0.009 |
| Kochi Prefecture     | Males | 0–39 | Hypertension   | 0.007 | 0.006 | 0.007 | 0.007 | 0.007 | 0.007 |
| Fukuoka Prefecture   | Males | 0–39 | Hypertension   | 0.008 | 0.009 | 0.009 | 0.009 | 0.010 | 0.009 |
| Saga Prefecture      | Males | 0–39 | Hypertension   | 0.010 | 0.010 | 0.010 | 0.008 | 0.008 | 0.010 |
| Nagasaki Prefecture  | Males | 0–39 | Hypertension   | 0.008 | 0.009 | 0.011 | 0.012 | 0.011 | 0.010 |
| Kumamoto Prefecture  | Males | 0–39 | Hypertension   | 0.008 | 0.009 | 0.010 | 0.010 | 0.011 | 0.011 |
| Oita Prefecture      | Males | 0–39 | Hypertension   | 0.010 | 0.011 | 0.009 | 0.009 | 0.010 | 0.009 |
| Miyazaki Prefecture  | Males | 0–39 | Hypertension   | 0.007 | 0.008 | 0.008 | 0.010 | 0.009 | 0.011 |
| Kagoshima Prefecture | Males | 0–39 | Hypertension   | 0.010 | 0.008 | 0.008 | 0.008 | 0.009 | 0.010 |
| Okinawa Prefecture   | Males | 0–39 | Hypertension   | 0.009 | 0.015 | 0.012 | 0.012 | 0.013 | 0.013 |
| Hokkaido Prefecture  | Males | 0–39 | Hyperlipidemia | 0.024 | 0.024 | 0.022 | 0.023 | 0.025 | 0.024 |
| Aomori Prefecture    | Males | 0–39 | Hyperlipidemia | 0.023 | 0.021 | 0.021 | 0.020 | 0.024 | 0.023 |



|                               |       |      |                |       |       |       |       |       |       |
|-------------------------------|-------|------|----------------|-------|-------|-------|-------|-------|-------|
| Iwate Prefecture              | Males | 0–39 | Hyperlipidemia | 0.026 | 0.027 | 0.025 | 0.030 | 0.032 | 0.031 |
| Miyagi Prefecture             | Males | 0–39 | Hyperlipidemia | 0.024 | 0.025 | 0.022 | 0.027 | 0.027 | 0.026 |
| Akita Prefecture              | Males | 0–39 | Hyperlipidemia | 0.031 | 0.032 | 0.024 | 0.025 | 0.034 | 0.030 |
| Yamagata Prefecture           | Males | 0–39 | Hyperlipidemia | 0.022 | 0.025 | 0.030 | 0.033 | 0.037 | 0.036 |
| Fukushima Prefecture          | Males | 0–39 | Hyperlipidemia | 0.023 | 0.026 | 0.023 | 0.024 | 0.027 | 0.028 |
| Ibaraki Prefecture            | Males | 0–39 | Hyperlipidemia | 0.023 | 0.022 | 0.021 | 0.020 | 0.021 | 0.021 |
| Tochigi Prefecture            | Males | 0–39 | Hyperlipidemia | 0.032 | 0.030 | 0.027 | 0.028 | 0.028 | 0.029 |
| Gunma Prefecture              | Males | 0–39 | Hyperlipidemia | 0.021 | 0.023 | 0.020 | 0.021 | 0.024 | 0.024 |
| Saitama Prefecture            | Males | 0–39 | Hyperlipidemia | 0.016 | 0.014 | 0.013 | 0.015 | 0.016 | 0.016 |
| Chiba Prefecture              | Males | 0–39 | Hyperlipidemia | 0.017 | 0.016 | 0.015 | 0.016 | 0.016 | 0.017 |
| Tokyo Metropolitan Government | Males | 0–39 | Hyperlipidemia | 0.017 | 0.018 | 0.016 | 0.017 | 0.018 | 0.019 |
| Kanagawa Prefecture           | Males | 0–39 | Hyperlipidemia | 0.017 | 0.016 | 0.015 | 0.017 | 0.018 | 0.018 |
| Niigata Prefecture            | Males | 0–39 | Hyperlipidemia | 0.022 | 0.024 | 0.023 | 0.026 | 0.030 | 0.031 |
| Toyama Prefecture             | Males | 0–39 | Hyperlipidemia | 0.025 | 0.025 | 0.023 | 0.022 | 0.024 | 0.024 |
| Ishikawa Prefecture           | Males | 0–39 | Hyperlipidemia | 0.021 | 0.019 | 0.017 | 0.018 | 0.022 | 0.022 |
| Fukui Prefecture              | Males | 0–39 | Hyperlipidemia | 0.024 | 0.023 | 0.016 | 0.018 | 0.025 | 0.027 |
| Yamanashi Prefecture          | Males | 0–39 | Hyperlipidemia | 0.017 | 0.019 | 0.016 | 0.017 | 0.016 | 0.015 |
| Nagano Prefecture             | Males | 0–39 | Hyperlipidemia | 0.025 | 0.027 | 0.025 | 0.024 | 0.025 | 0.028 |
| Gifu Prefecture               | Males | 0–39 | Hyperlipidemia | 0.015 | 0.016 | 0.014 | 0.017 | 0.019 | 0.020 |
| Shizuoka Prefecture           | Males | 0–39 | Hyperlipidemia | 0.020 | 0.021 | 0.019 | 0.021 | 0.024 | 0.026 |
| Aichi Prefecture              | Males | 0–39 | Hyperlipidemia | 0.018 | 0.019 | 0.019 | 0.020 | 0.022 | 0.023 |
| Mie Prefecture                | Males | 0–39 | Hyperlipidemia | 0.014 | 0.014 | 0.014 | 0.018 | 0.018 | 0.018 |
| Shiga Prefecture              | Males | 0–39 | Hyperlipidemia | 0.015 | 0.016 | 0.015 | 0.016 | 0.017 | 0.019 |
| Kyoto Prefecture              | Males | 0–39 | Hyperlipidemia | 0.017 | 0.015 | 0.016 | 0.015 | 0.015 | 0.017 |

|                      |       |      |                |       |       |       |       |       |       |
|----------------------|-------|------|----------------|-------|-------|-------|-------|-------|-------|
| Osaka Prefecture     | Males | 0–39 | Hyperlipidemia | 0.018 | 0.018 | 0.017 | 0.017 | 0.017 | 0.017 |
| Hyogo Prefecture     | Males | 0–39 | Hyperlipidemia | 0.016 | 0.014 | 0.014 | 0.015 | 0.018 | 0.018 |
| Nara Prefecture      | Males | 0–39 | Hyperlipidemia | 0.014 | 0.014 | 0.011 | 0.013 | 0.013 | 0.014 |
| Wakayama Prefecture  | Males | 0–39 | Hyperlipidemia | 0.016 | 0.017 | 0.018 | 0.016 | 0.016 | 0.017 |
| Tottori Prefecture   | Males | 0–39 | Hyperlipidemia | 0.026 | 0.018 | 0.019 | 0.017 | 0.019 | 0.021 |
| Shimane Prefecture   | Males | 0–39 | Hyperlipidemia | 0.014 | 0.020 | 0.022 | 0.024 | 0.027 | 0.026 |
| Okayama Prefecture   | Males | 0–39 | Hyperlipidemia | 0.021 | 0.019 | 0.020 | 0.019 | 0.020 | 0.023 |
| Hiroshima Prefecture | Males | 0–39 | Hyperlipidemia | 0.017 | 0.018 | 0.017 | 0.018 | 0.019 | 0.019 |
| Yamaguchi Prefecture | Males | 0–39 | Hyperlipidemia | 0.013 | 0.013 | 0.012 | 0.015 | 0.017 | 0.018 |
| Tokushima Prefecture | Males | 0–39 | Hyperlipidemia | 0.016 | 0.022 | 0.014 | 0.020 | 0.018 | 0.019 |
| Kagawa Prefecture    | Males | 0–39 | Hyperlipidemia | 0.017 | 0.019 | 0.018 | 0.018 | 0.022 | 0.022 |
| Ehime Prefecture     | Males | 0–39 | Hyperlipidemia | 0.016 | 0.017 | 0.017 | 0.017 | 0.020 | 0.022 |
| Kochi Prefecture     | Males | 0–39 | Hyperlipidemia | 0.018 | 0.011 | 0.012 | 0.015 | 0.016 | 0.017 |
| Fukuoka Prefecture   | Males | 0–39 | Hyperlipidemia | 0.015 | 0.017 | 0.015 | 0.018 | 0.019 | 0.019 |
| Saga Prefecture      | Males | 0–39 | Hyperlipidemia | 0.034 | 0.025 | 0.023 | 0.027 | 0.025 | 0.025 |
| Nagasaki Prefecture  | Males | 0–39 | Hyperlipidemia | 0.014 | 0.015 | 0.016 | 0.019 | 0.019 | 0.021 |
| Kumamoto Prefecture  | Males | 0–39 | Hyperlipidemia | 0.019 | 0.021 | 0.020 | 0.019 | 0.022 | 0.022 |
| Oita Prefecture      | Males | 0–39 | Hyperlipidemia | 0.018 | 0.014 | 0.016 | 0.019 | 0.020 | 0.021 |
| Miyazaki Prefecture  | Males | 0–39 | Hyperlipidemia | 0.016 | 0.015 | 0.017 | 0.022 | 0.022 | 0.025 |
| Kagoshima Prefecture | Males | 0–39 | Hyperlipidemia | 0.021 | 0.018 | 0.016 | 0.017 | 0.022 | 0.020 |
| Okinawa Prefecture   | Males | 0–39 | Hyperlipidemia | 0.016 | 0.017 | 0.016 | 0.017 | 0.018 | 0.017 |
| Hokkaido Prefecture  | Males | 0–39 | Diabetes       | 0.013 | 0.013 | 0.013 | 0.014 | 0.014 | 0.013 |
| Aomori Prefecture    | Males | 0–39 | Diabetes       | 0.009 | 0.009 | 0.011 | 0.010 | 0.012 | 0.013 |
| Iwate Prefecture     | Males | 0–39 | Diabetes       | 0.007 | 0.006 | 0.008 | 0.008 | 0.008 | 0.009 |

|                               |       |      |          |       |       |       |       |       |       |
|-------------------------------|-------|------|----------|-------|-------|-------|-------|-------|-------|
| Miyagi Prefecture             | Males | 0-39 | Diabetes | 0.010 | 0.011 | 0.010 | 0.011 | 0.010 | 0.010 |
| Akita Prefecture              | Males | 0-39 | Diabetes | 0.009 | 0.009 | 0.008 | 0.008 | 0.010 | 0.010 |
| Yamagata Prefecture           | Males | 0-39 | Diabetes | 0.010 | 0.010 | 0.010 | 0.013 | 0.015 | 0.013 |
| Fukushima Prefecture          | Males | 0-39 | Diabetes | 0.006 | 0.007 | 0.007 | 0.008 | 0.009 | 0.009 |
| Ibaraki Prefecture            | Males | 0-39 | Diabetes | 0.008 | 0.009 | 0.010 | 0.009 | 0.010 | 0.010 |
| Tochigi Prefecture            | Males | 0-39 | Diabetes | 0.009 | 0.010 | 0.010 | 0.011 | 0.010 | 0.012 |
| Gunma Prefecture              | Males | 0-39 | Diabetes | 0.008 | 0.009 | 0.009 | 0.011 | 0.010 | 0.010 |
| Saitama Prefecture            | Males | 0-39 | Diabetes | 0.006 | 0.007 | 0.007 | 0.007 | 0.007 | 0.008 |
| Chiba Prefecture              | Males | 0-39 | Diabetes | 0.009 | 0.009 | 0.008 | 0.009 | 0.009 | 0.009 |
| Tokyo Metropolitan Government | Males | 0-39 | Diabetes | 0.008 | 0.008 | 0.009 | 0.009 | 0.009 | 0.010 |
| Kanagawa Prefecture           | Males | 0-39 | Diabetes | 0.007 | 0.007 | 0.007 | 0.009 | 0.009 | 0.009 |
| Niigata Prefecture            | Males | 0-39 | Diabetes | 0.006 | 0.006 | 0.008 | 0.009 | 0.010 | 0.010 |
| Toyama Prefecture             | Males | 0-39 | Diabetes | 0.010 | 0.010 | 0.010 | 0.009 | 0.010 | 0.010 |
| Ishikawa Prefecture           | Males | 0-39 | Diabetes | 0.008 | 0.010 | 0.008 | 0.009 | 0.011 | 0.011 |
| Fukui Prefecture              | Males | 0-39 | Diabetes | 0.006 | 0.008 | 0.007 | 0.009 | 0.010 | 0.011 |
| Yamanashi Prefecture          | Males | 0-39 | Diabetes | 0.008 | 0.008 | 0.008 | 0.009 | 0.009 | 0.009 |
| Nagano Prefecture             | Males | 0-39 | Diabetes | 0.008 | 0.007 | 0.008 | 0.008 | 0.008 | 0.008 |
| Gifu Prefecture               | Males | 0-39 | Diabetes | 0.007 | 0.007 | 0.007 | 0.008 | 0.008 | 0.008 |
| Shizuoka Prefecture           | Males | 0-39 | Diabetes | 0.009 | 0.009 | 0.009 | 0.010 | 0.011 | 0.011 |
| Aichi Prefecture              | Males | 0-39 | Diabetes | 0.007 | 0.007 | 0.008 | 0.008 | 0.009 | 0.009 |
| Mie Prefecture                | Males | 0-39 | Diabetes | 0.007 | 0.006 | 0.007 | 0.008 | 0.008 | 0.008 |
| Shiga Prefecture              | Males | 0-39 | Diabetes | 0.007 | 0.008 | 0.007 | 0.007 | 0.009 | 0.009 |
| Kyoto Prefecture              | Males | 0-39 | Diabetes | 0.006 | 0.006 | 0.006 | 0.006 | 0.007 | 0.007 |
| Osaka Prefecture              | Males | 0-39 | Diabetes | 0.008 | 0.009 | 0.008 | 0.009 | 0.009 | 0.009 |

|                      |       |      |                  |       |       |       |       |       |       |
|----------------------|-------|------|------------------|-------|-------|-------|-------|-------|-------|
| Hyogo Prefecture     | Males | 0-39 | Diabetes         | 0.007 | 0.007 | 0.008 | 0.008 | 0.009 | 0.008 |
| Nara Prefecture      | Males | 0-39 | Diabetes         | 0.005 | 0.004 | 0.006 | 0.006 | 0.007 | 0.007 |
| Wakayama Prefecture  | Males | 0-39 | Diabetes         | 0.006 | 0.006 | 0.008 | 0.007 | 0.007 | 0.008 |
| Tottori Prefecture   | Males | 0-39 | Diabetes         | 0.005 | 0.005 | 0.008 | 0.009 | 0.009 | 0.008 |
| Shimane Prefecture   | Males | 0-39 | Diabetes         | 0.007 | 0.009 | 0.008 | 0.009 | 0.010 | 0.011 |
| Okayama Prefecture   | Males | 0-39 | Diabetes         | 0.007 | 0.006 | 0.008 | 0.008 | 0.008 | 0.009 |
| Hiroshima Prefecture | Males | 0-39 | Diabetes         | 0.010 | 0.011 | 0.012 | 0.011 | 0.012 | 0.012 |
| Yamaguchi Prefecture | Males | 0-39 | Diabetes         | 0.007 | 0.007 | 0.007 | 0.007 | 0.009 | 0.009 |
| Tokushima Prefecture | Males | 0-39 | Diabetes         | 0.007 | 0.011 | 0.008 | 0.011 | 0.010 | 0.012 |
| Kagawa Prefecture    | Males | 0-39 | Diabetes         | 0.008 | 0.009 | 0.011 | 0.010 | 0.010 | 0.009 |
| Ehime Prefecture     | Males | 0-39 | Diabetes         | 0.005 | 0.007 | 0.007 | 0.008 | 0.009 | 0.010 |
| Kochi Prefecture     | Males | 0-39 | Diabetes         | 0.005 | 0.004 | 0.004 | 0.007 | 0.006 | 0.006 |
| Fukuoka Prefecture   | Males | 0-39 | Diabetes         | 0.007 | 0.007 | 0.008 | 0.008 | 0.009 | 0.009 |
| Saga Prefecture      | Males | 0-39 | Diabetes         | 0.006 | 0.005 | 0.005 | 0.007 | 0.006 | 0.007 |
| Nagasaki Prefecture  | Males | 0-39 | Diabetes         | 0.008 | 0.008 | 0.009 | 0.010 | 0.010 | 0.013 |
| Kumamoto Prefecture  | Males | 0-39 | Diabetes         | 0.008 | 0.008 | 0.008 | 0.009 | 0.009 | 0.010 |
| Oita Prefecture      | Males | 0-39 | Diabetes         | 0.008 | 0.008 | 0.007 | 0.009 | 0.011 | 0.010 |
| Miyazaki Prefecture  | Males | 0-39 | Diabetes         | 0.005 | 0.007 | 0.010 | 0.012 | 0.011 | 0.010 |
| Kagoshima Prefecture | Males | 0-39 | Diabetes         | 0.008 | 0.007 | 0.008 | 0.009 | 0.009 | 0.010 |
| Okinawa Prefecture   | Males | 0-39 | Diabetes         | 0.006 | 0.009 | 0.006 | 0.006 | 0.008 | 0.008 |
| Hokkaido Prefecture  | Males | 0-39 | Mental disorders | 0.065 | 0.069 | 0.067 | 0.071 | 0.073 | 0.073 |
| Aomori Prefecture    | Males | 0-39 | Mental disorders | 0.059 | 0.057 | 0.058 | 0.058 | 0.062 | 0.062 |
| Iwate Prefecture     | Males | 0-39 | Mental disorders | 0.046 | 0.052 | 0.053 | 0.059 | 0.060 | 0.063 |
| Miyagi Prefecture    | Males | 0-39 | Mental disorders | 0.061 | 0.062 | 0.061 | 0.064 | 0.065 | 0.066 |

|                               |       |      |                  |       |       |       |       |       |       |
|-------------------------------|-------|------|------------------|-------|-------|-------|-------|-------|-------|
| Akita Prefecture              | Males | 0-39 | Mental disorders | 0.060 | 0.061 | 0.060 | 0.065 | 0.067 | 0.071 |
| Yamagata Prefecture           | Males | 0-39 | Mental disorders | 0.054 | 0.058 | 0.056 | 0.063 | 0.062 | 0.064 |
| Fukushima Prefecture          | Males | 0-39 | Mental disorders | 0.057 | 0.061 | 0.063 | 0.067 | 0.065 | 0.067 |
| Ibaraki Prefecture            | Males | 0-39 | Mental disorders | 0.049 | 0.050 | 0.052 | 0.053 | 0.057 | 0.062 |
| Tochigi Prefecture            | Males | 0-39 | Mental disorders | 0.060 | 0.062 | 0.063 | 0.068 | 0.070 | 0.069 |
| Gunma Prefecture              | Males | 0-39 | Mental disorders | 0.048 | 0.051 | 0.055 | 0.060 | 0.062 | 0.060 |
| Saitama Prefecture            | Males | 0-39 | Mental disorders | 0.050 | 0.052 | 0.054 | 0.057 | 0.059 | 0.059 |
| Chiba Prefecture              | Males | 0-39 | Mental disorders | 0.050 | 0.054 | 0.054 | 0.057 | 0.060 | 0.060 |
| Tokyo Metropolitan Government | Males | 0-39 | Mental disorders | 0.070 | 0.073 | 0.072 | 0.077 | 0.080 | 0.078 |
| Kanagawa Prefecture           | Males | 0-39 | Mental disorders | 0.057 | 0.059 | 0.061 | 0.065 | 0.068 | 0.068 |
| Niigata Prefecture            | Males | 0-39 | Mental disorders | 0.047 | 0.057 | 0.060 | 0.064 | 0.069 | 0.073 |
| Toyama Prefecture             | Males | 0-39 | Mental disorders | 0.058 | 0.057 | 0.061 | 0.061 | 0.067 | 0.068 |
| Ishikawa Prefecture           | Males | 0-39 | Mental disorders | 0.049 | 0.051 | 0.058 | 0.057 | 0.057 | 0.062 |
| Fukui Prefecture              | Males | 0-39 | Mental disorders | 0.049 | 0.054 | 0.049 | 0.053 | 0.057 | 0.069 |
| Yamanashi Prefecture          | Males | 0-39 | Mental disorders | 0.054 | 0.058 | 0.057 | 0.056 | 0.065 | 0.063 |
| Nagano Prefecture             | Males | 0-39 | Mental disorders | 0.070 | 0.075 | 0.075 | 0.079 | 0.083 | 0.086 |
| Gifu Prefecture               | Males | 0-39 | Mental disorders | 0.056 | 0.057 | 0.059 | 0.063 | 0.065 | 0.064 |
| Shizuoka Prefecture           | Males | 0-39 | Mental disorders | 0.062 | 0.065 | 0.066 | 0.070 | 0.071 | 0.071 |
| Aichi Prefecture              | Males | 0-39 | Mental disorders | 0.064 | 0.065 | 0.066 | 0.068 | 0.072 | 0.070 |
| Mie Prefecture                | Males | 0-39 | Mental disorders | 0.053 | 0.052 | 0.053 | 0.055 | 0.057 | 0.057 |
| Shiga Prefecture              | Males | 0-39 | Mental disorders | 0.058 | 0.058 | 0.052 | 0.050 | 0.054 | 0.051 |
| Kyoto Prefecture              | Males | 0-39 | Mental disorders | 0.051 | 0.049 | 0.048 | 0.054 | 0.057 | 0.058 |
| Osaka Prefecture              | Males | 0-39 | Mental disorders | 0.056 | 0.061 | 0.061 | 0.065 | 0.068 | 0.067 |
| Hyogo Prefecture              | Males | 0-39 | Mental disorders | 0.056 | 0.058 | 0.059 | 0.063 | 0.066 | 0.065 |

|                      |       |      |                  |       |       |       |       |       |       |
|----------------------|-------|------|------------------|-------|-------|-------|-------|-------|-------|
| Nara Prefecture      | Males | 0–39 | Mental disorders | 0.051 | 0.056 | 0.059 | 0.062 | 0.063 | 0.068 |
| Wakayama Prefecture  | Males | 0–39 | Mental disorders | 0.053 | 0.061 | 0.060 | 0.062 | 0.068 | 0.069 |
| Tottori Prefecture   | Males | 0–39 | Mental disorders | 0.074 | 0.071 | 0.064 | 0.067 | 0.073 | 0.076 |
| Shimane Prefecture   | Males | 0–39 | Mental disorders | 0.051 | 0.060 | 0.057 | 0.059 | 0.069 | 0.068 |
| Okayama Prefecture   | Males | 0–39 | Mental disorders | 0.076 | 0.083 | 0.083 | 0.082 | 0.085 | 0.081 |
| Hiroshima Prefecture | Males | 0–39 | Mental disorders | 0.067 | 0.070 | 0.068 | 0.070 | 0.075 | 0.073 |
| Yamaguchi Prefecture | Males | 0–39 | Mental disorders | 0.054 | 0.056 | 0.058 | 0.062 | 0.061 | 0.066 |
| Tokushima Prefecture | Males | 0–39 | Mental disorders | 0.059 | 0.065 | 0.071 | 0.068 | 0.075 | 0.076 |
| Kagawa Prefecture    | Males | 0–39 | Mental disorders | 0.057 | 0.069 | 0.068 | 0.073 | 0.073 | 0.072 |
| Ehime Prefecture     | Males | 0–39 | Mental disorders | 0.044 | 0.051 | 0.048 | 0.056 | 0.057 | 0.058 |
| Kochi Prefecture     | Males | 0–39 | Mental disorders | 0.045 | 0.046 | 0.050 | 0.052 | 0.061 | 0.059 |
| Fukuoka Prefecture   | Males | 0–39 | Mental disorders | 0.052 | 0.055 | 0.055 | 0.060 | 0.062 | 0.062 |
| Saga Prefecture      | Males | 0–39 | Mental disorders | 0.051 | 0.058 | 0.058 | 0.065 | 0.068 | 0.073 |
| Nagasaki Prefecture  | Males | 0–39 | Mental disorders | 0.060 | 0.068 | 0.067 | 0.071 | 0.075 | 0.074 |
| Kumamoto Prefecture  | Males | 0–39 | Mental disorders | 0.053 | 0.057 | 0.060 | 0.062 | 0.066 | 0.064 |
| Oita Prefecture      | Males | 0–39 | Mental disorders | 0.054 | 0.057 | 0.059 | 0.060 | 0.067 | 0.066 |
| Miyazaki Prefecture  | Males | 0–39 | Mental disorders | 0.053 | 0.055 | 0.052 | 0.055 | 0.057 | 0.060 |
| Kagoshima Prefecture | Males | 0–39 | Mental disorders | 0.049 | 0.050 | 0.049 | 0.054 | 0.052 | 0.053 |
| Okinawa Prefecture   | Males | 0–39 | Mental disorders | 0.046 | 0.053 | 0.057 | 0.058 | 0.060 | 0.061 |

Table S4. Population density and COVID–19 infection rate in 2020 in each prefecture.

| Prefectures                   | Population density (persons/km <sup>2</sup> ) | COVID-19 infection rate (10 <sup>-5</sup> /y) |
|-------------------------------|-----------------------------------------------|-----------------------------------------------|
| Hokkaido Prefecture           | 63.1                                          | 255.1                                         |
| Aomori Prefecture             | 132.3                                         | 37.8                                          |
| Iwate Prefecture              | 80.9                                          | 31.2                                          |
| Miyagi Prefecture             | 314.8                                         | 95.6                                          |
| Akita Prefecture              | 84.7                                          | 14.2                                          |
| Yamagata Prefecture           | 116.1                                         | 35.8                                          |
| Fukushima Prefecture          | 136.5                                         | 50.2                                          |
| Ibaraki Prefecture            | 479.1                                         | 83.7                                          |
| Tochigi Prefecture            | 306.7                                         | 75.2                                          |
| Gunma Prefecture              | 309.5                                         | 117.5                                         |
| Saitama Prefecture            | 1945.9                                        | 193.5                                         |
| Chiba Prefecture              | 1225.3                                        | 175.4                                         |
| Tokyo Metropolitan Government | 6305.6                                        | 435.8                                         |
| Kanagawa Prefecture           | 3811.4                                        | 230.9                                         |
| Niigata Prefecture            | 177.7                                         | 24.3                                          |
| Toyama Prefecture             | 248.6                                         | 53.1                                          |
| Ishikawa Prefecture           | 272.2                                         | 94.0                                          |
| Fukui Prefecture              | 186.1                                         | 45.5                                          |
| Yamanashi Prefecture          | 185.1                                         | 69.1                                          |
| Nagano Prefecture             | 153.9                                         | 56.7                                          |
| Gifu Prefecture               | 191.4                                         | 112.8                                         |
| Shizuoka Prefecture           | 476.8                                         | 72.4                                          |

---

|                      |        |       |
|----------------------|--------|-------|
| Aichi Prefecture     | 1464.4 | 218.7 |
| Mie Prefecture       | 314.1  | 71.2  |
| Shiga Prefecture     | 353.7  | 83.2  |
| Kyoto Prefecture     | 552.0  | 188.9 |
| Osaka Prefecture     | 4644.8 | 339.7 |
| Hyogo Prefecture     | 660.6  | 180.5 |
| Nara Prefecture      | 366.8  | 145.9 |
| Wakayama Prefecture  | 202.0  | 64.9  |
| Tottori Prefecture   | 160.0  | 21.2  |
| Shimane Prefecture   | 101.3  | 30.6  |
| Okayama Prefecture   | 267.6  | 71.6  |
| Hiroshima Prefecture | 333.4  | 117.4 |
| Yamaguchi Prefecture | 224.1  | 42.9  |
| Tokushima Prefecture | 179.1  | 26.7  |
| Kagawa Prefecture    | 522.9  | 31.0  |
| Ehime Prefecture     | 241.2  | 33.9  |
| Kochi Prefecture     | 99.8   | 93.5  |
| Fukuoka Prefecture   | 1028.7 | 174.8 |
| Saga Prefecture      | 337.5  | 56.8  |
| Nagasaki Prefecture  | 327.0  | 48.5  |
| Kumamoto Prefecture  | 238.9  | 105.9 |
| Oita Prefecture      | 181.6  | 59.8  |
| Miyazaki Prefecture  | 141.7  | 69.1  |
| Kagoshima Prefecture | 177.4  | 62.3  |

---



---

|                    |       |       |
|--------------------|-------|-------|
| Okinawa Prefecture | 649.5 | 362.1 |
|--------------------|-------|-------|

---

Table S5. Difference in age-adjusted prevalence between three time periods and 2009–2010 (males and females, 0–74 years). Arithmetic mean (95% uncertainty interval).

| Ages and sexes                             | Hypertension              |                           |                           | Hyperlipidemia            |                           |                           | Diabetes                  |                           |                           | Mental disorders          |                           |                           |
|--------------------------------------------|---------------------------|---------------------------|---------------------------|---------------------------|---------------------------|---------------------------|---------------------------|---------------------------|---------------------------|---------------------------|---------------------------|---------------------------|
|                                            | 2011–2013 vs<br>2009–2010 | 2014–2016 vs<br>2009–2010 | 2017–2019 vs<br>2009–2010 | 2011–2013 vs<br>2009–2010 | 2014–2016 vs<br>2009–2010 | 2017–2019 vs<br>2009–2010 | 2011–2013 vs<br>2009–2010 | 2014–2016 vs<br>2009–2010 | 2017–2019 vs<br>2009–2010 | 2011–2013 vs<br>2009–2010 | 2014–2016 vs<br>2009–2010 | 2017–2019 vs<br>2009–2010 |
| The whole of Japan                         | 0.001<br>(-0.003–0.005)   | 0.001<br>(-0.002–0.005)   | 0.002<br>(-0.001–0.005)   | 0.003<br>(-0.001–0.007)   | 0.005<br>(0.003–0.008)    | 0.004<br>(0.000–0.007)    | -0.001<br>(-0.003–0.001)  | 0.000<br>(-0.002–0.002)   | 0.002<br>(0.000–0.004)    | 0.004<br>(-0.002–0.009)   | 0.008<br>(0.002–0.014)    | 0.013<br>(0.008–0.019)    |
| Iwate Prefecture                           | 0.007<br>(-0.002–0.015)   | -0.007<br>(-0.013–0.000)  | -0.006<br>(-0.013–0.001)  | 0.019<br>(-0.004–0.043)   | 0.019<br>(-0.004–0.042)   | 0.020<br>(-0.003–0.042)   | 0.007<br>(0.003–0.012)    | -0.001<br>(-0.005–0.004)  | 0.002<br>(-0.001–0.006)   | 0.000<br>(-0.029–0.030)   | -0.002<br>(-0.031–0.027)  | 0.004<br>(-0.025–0.033)   |
| Miyagi Prefecture                          | -0.001<br>(-0.015–0.012)  | -0.005<br>(-0.017–0.008)  | -0.009<br>(-0.021–0.002)  | 0.013<br>(0.000–0.027)    | 0.010<br>(-0.002–0.021)   | 0.010<br>(-0.002–0.021)   | 0.004<br>(-0.014–0.021)   | 0.002<br>(-0.015–0.019)   | 0.000<br>(-0.017–0.017)   | -0.001<br>(-0.012–0.011)  | 0.000<br>(-0.011–0.012)   | 0.002<br>(-0.009–0.014)   |
| Fukushima Prefecture                       | 0.015<br>(0.011–0.018)    | 0.018<br>(0.015–0.020)    | 0.014<br>(0.013–0.016)    | 0.008<br>(0.002–0.014)    | 0.025<br>(0.020–0.031)    | 0.023<br>(0.016–0.030)    | 0.008<br>(0.003–0.014)    | 0.014<br>(0.013–0.015)    | 0.014<br>(0.013–0.015)    | 0.010<br>(0.003–0.018)    | 0.006<br>(0.002–0.009)    | 0.009<br>(0.006–0.012)    |
| Hamadori                                   | 0.031<br>(0.015–0.048)    | 0.015<br>(0.012–0.017)    | 0.018<br>(0.013–0.022)    | 0.004<br>(-0.024–0.032)   | 0.017<br>(-0.010–0.042)   | 0.010<br>(-0.015–0.035)   | 0.016<br>(-0.003–0.035)   | 0.019<br>(0.002–0.035)    | 0.013<br>(-0.003–0.029)   | 0.025<br>(0.002–0.047)    | 0.025<br>(0.016–0.034)    | 0.036<br>(0.026–0.046)    |
| Nakadori                                   | -0.005<br>(-0.017–0.007)  | 0.008<br>(-0.004–0.020)   | 0.001<br>(-0.011–0.014)   | 0.004<br>(-0.013–0.021)   | 0.037<br>(0.023–0.053)    | 0.032<br>(0.016–0.048)    | 0.004<br>(-0.007–0.014)   | 0.016<br>(0.011–0.021)    | 0.017<br>(0.013–0.022)    | 0.008<br>(0.004–0.012)    | 0.004<br>(-0.003–0.010)   | 0.009<br>(0.007–0.012)    |
| Aizu                                       | 0.015<br>(0.004–0.024)    | 0.013<br>(0.007–0.019)    | 0.009<br>(0.003–0.015)    | -0.006<br>(-0.012–0.000)  | -0.002<br>(-0.009–0.006)  | 0.005<br>(-0.002–0.011)   | 0.002<br>(-0.005–0.008)   | 0.010<br>(0.003–0.017)    | 0.014<br>(0.011–0.016)    | 0.008<br>(0.002–0.014)    | 0.009<br>(0.005–0.014)    | 0.011<br>(0.006–0.016)    |
| Iwate Prefecture vs the whole of Japan     | 0.006<br>(-0.003–0.015)   | -0.008<br>(-0.015–0.001)  | -0.008<br>(-0.015–0.000)  | 0.016<br>(-0.008–0.040)   | 0.014<br>(-0.009–0.037)   | 0.016<br>(-0.008–0.039)   | 0.008<br>(0.004–0.013)    | -0.001<br>(-0.006–0.004)  | 0.001<br>(-0.004–0.005)   | -0.003<br>(-0.033–0.026)  | -0.010<br>(-0.040–0.019)  | -0.009<br>(-0.039–0.020)  |
| Miyagi Prefecture vs the whole of Japan    | -0.002<br>(-0.016–0.012)  | -0.006<br>(-0.019–0.007)  | -0.011<br>(-0.023–0.001)  | 0.010<br>(-0.004–0.024)   | 0.004<br>(-0.007–0.016)   | 0.006<br>(-0.006–0.018)   | 0.005<br>(-0.013–0.022)   | 0.002<br>(-0.015–0.019)   | -0.002<br>(-0.018–0.015)  | -0.004<br>(-0.017–0.008)  | -0.008<br>(-0.021–0.005)  | -0.011<br>(-0.024–0.002)  |
| Fukushima Prefecture vs the whole of Japan | 0.014<br>(0.009–0.019)    | 0.016<br>(0.012–0.020)    | 0.013<br>(0.009–0.016)    | 0.005<br>(-0.002–0.012)   | 0.020<br>(0.014–0.027)    | 0.019<br>(0.011–0.027)    | 0.009<br>(0.004–0.015)    | 0.013<br>(0.011–0.016)    | 0.012<br>(0.010–0.014)    | 0.006<br>(-0.003–0.015)   | -0.002<br>(-0.009–0.004)  | -0.005<br>(-0.011–0.002)  |
| Hamadori vs the whole of Japan             | 0.031<br>(0.013–0.048)    | 0.013<br>(0.009–0.017)    | 0.016<br>(0.010–0.021)    | 0.001<br>(-0.027–0.029)   | 0.011<br>(-0.015–0.037)   | 0.006<br>(-0.020–0.031)   | 0.017<br>(-0.002–0.036)   | 0.018<br>(0.002–0.035)    | 0.011<br>(-0.005–0.028)   | 0.021<br>(-0.002–0.044)   | 0.017<br>(0.007–0.028)    | 0.022<br>(0.011–0.034)    |
| Nakadori vs the whole of Japan             | -0.006<br>(-0.019–0.007)  | 0.006<br>(-0.006–0.019)   | -0.001<br>(-0.013–0.012)  | 0.001<br>(-0.016–0.018)   | 0.032<br>(0.017–0.048)    | 0.028<br>(0.012–0.044)    | 0.005<br>(-0.006–0.015)   | 0.016<br>(0.010–0.021)    | 0.015<br>(0.010–0.021)    | 0.004<br>(-0.003–0.011)   | -0.004<br>(-0.013–0.005)  | -0.004<br>(-0.010–0.002)  |
| Aizu vs the whole of Japan                 | 0.014<br>(0.003–0.024)    | 0.012<br>(0.005–0.018)    | 0.007<br>(0.000–0.014)    | -0.009<br>(-0.017–0.002)  | -0.007<br>(-0.015–0.001)  | 0.001<br>(-0.006–0.008)   | 0.003<br>(-0.004–0.009)   | 0.010<br>(0.002–0.017)    | 0.012<br>(0.009–0.014)    | 0.004<br>(-0.005–0.012)   | 0.001<br>(-0.006–0.008)   | -0.002<br>(-0.010–0.006)  |

Table S6. Difference in age-adjusted prevalence between three time periods and 2009–2010 by age groups and sex (Fukushima Prefecture vs the whole of Japan). Arithmetic mean (95% uncertainty interval).

| Ages and sexes              | Hypertension             |                          |                          | Hyperlipidemia           |                         |                         | Diabetes                |                         |                         | Mental disorders        |                          |                          |
|-----------------------------|--------------------------|--------------------------|--------------------------|--------------------------|-------------------------|-------------------------|-------------------------|-------------------------|-------------------------|-------------------------|--------------------------|--------------------------|
|                             | 2011–2013 vs 2009–2010   | 2014–2016 vs 2009–2010   | 2017–2019 vs 2009–2010   | 2011–2013 vs 2009–2010   | 2014–2016 vs 2009–2010  | 2017–2019 vs 2009–2010  | 2011–2013 vs 2009–2010  | 2014–2016 vs 2009–2010  | 2017–2019 vs 2009–2010  | 2011–2013 vs 2009–2010  | 2014–2016 vs 2009–2010   | 2017–2019 vs 2009–2010   |
| Males and females (0–74 y)  | 0.014<br>(0.009–0.019)   | 0.016<br>(0.012–0.020)   | 0.013<br>(0.009–0.016)   | 0.005<br>(-0.002–0.012)  | 0.020<br>(0.014–0.027)  | 0.019<br>(0.011–0.027)  | 0.009<br>(0.004–0.015)  | 0.013<br>(0.011–0.016)  | 0.012<br>(0.010–0.014)  | 0.006<br>(-0.003–0.015) | -0.002<br>(-0.009–0.004) | -0.005<br>(-0.011–0.002) |
| Males (0–74 y)              | 0.005<br>(-0.008–0.018)  | 0.002<br>(-0.005–0.010)  | 0.000<br>(-0.007–0.007)  | 0.003<br>(-0.007–0.014)  | 0.031<br>(0.025–0.037)  | 0.029<br>(0.022–0.036)  | 0.002<br>(-0.003–0.008) | 0.006<br>(0.002–0.010)  | 0.005<br>(0.002–0.008)  | 0.000<br>(-0.009–0.010) | -0.006<br>(-0.015–0.003) | -0.006<br>(-0.013–0.001) |
| Females (0–74 y)            | 0.023<br>(0.019–0.027)   | 0.026<br>(0.020–0.033)   | 0.020<br>(0.016–0.025)   | 0.013<br>(0.004–0.023)   | 0.019<br>(0.009–0.030)  | 0.019<br>(0.009–0.030)  | 0.013<br>(0.005–0.022)  | 0.017<br>(0.011–0.023)  | 0.015<br>(0.009–0.021)  | 0.013<br>(0.006–0.019)  | 0.007<br>(0.001–0.013)   | 0.003<br>(-0.003–0.009)  |
| Males and females (0–39 y)  | 0.000<br>(-0.001–0.001)  | 0.000<br>(-0.001–0.001)  | 0.001<br>(0.000–0.003)   | 0.000<br>(-0.002–0.003)  | 0.004<br>(0.002–0.006)  | 0.006<br>(0.002–0.009)  | 0.001<br>(0.001–0.002)  | 0.001<br>(0.000–0.001)  | 0.002<br>(0.001–0.003)  | 0.000<br>(-0.007–0.007) | -0.002<br>(-0.009–0.006) | -0.002<br>(-0.009–0.005) |
| Males and females (40–74 y) | 0.035<br>(0.022–0.048)   | 0.041<br>(0.030–0.052)   | 0.030<br>(0.021–0.039)   | 0.011<br>(-0.004–0.026)  | 0.045<br>(0.031–0.058)  | 0.040<br>(0.025–0.056)  | 0.021<br>(0.007–0.035)  | 0.033<br>(0.027–0.038)  | 0.028<br>(0.023–0.034)  | 0.015<br>(0.000–0.030)  | -0.003<br>(-0.011–0.005) | -0.008<br>(-0.016–0.001) |
| Males (0–39 y)              | -0.001<br>(-0.003–0.002) | -0.003<br>(-0.005–0.000) | -0.001<br>(-0.003–0.002) | -0.001<br>(-0.004–0.001) | 0.004<br>(0.002–0.006)  | 0.004<br>(0.001–0.008)  | 0.001<br>(-0.001–0.002) | 0.001<br>(-0.001–0.002) | 0.001<br>(-0.001–0.002) | 0.001<br>(-0.007–0.009) | -0.002<br>(-0.012–0.008) | -0.002<br>(-0.009–0.006) |
| Males (40–74 y)             | 0.013<br>(-0.017–0.043)  | 0.010<br>(-0.008–0.027)  | 0.002<br>(-0.015–0.019)  | 0.011<br>(-0.013–0.035)  | 0.071<br>(0.057–0.085)  | 0.068<br>(0.052–0.083)  | 0.005<br>(-0.009–0.020) | 0.014<br>(0.005–0.023)  | 0.010<br>(0.003–0.018)  | 0.000<br>(-0.014–0.014) | -0.011<br>(-0.022–0.000) | -0.013<br>(-0.023–0.003) |
| Females (0–39 y)            | 0.001<br>(-0.001–0.002)  | 0.001<br>(0.000–0.002)   | 0.001<br>(0.001–0.002)   | 0.001<br>(-0.003–0.006)  | 0.002<br>(-0.003–0.006) | 0.004<br>(-0.001–0.008) | 0.002<br>(0.001–0.004)  | 0.001<br>(-0.001–0.002) | 0.002<br>(0.000–0.003)  | 0.000<br>(-0.006–0.006) | 0.000<br>(-0.007–0.007)  | -0.001<br>(-0.008–0.005) |
| Females (40–74 y)           | 0.057<br>(0.046–0.068)   | 0.064<br>(0.048–0.081)   | 0.049<br>(0.039–0.060)   | 0.032<br>(0.013–0.051)   | 0.046<br>(0.026–0.067)  | 0.043<br>(0.023–0.064)  | 0.030<br>(0.011–0.051)  | 0.042<br>(0.028–0.056)  | 0.036<br>(0.024–0.048)  | 0.032<br>(0.023–0.041)  | 0.017<br>(0.008–0.026)   | 0.010<br>(0.004–0.016)   |

Table S7. Difference between observed and estimated prevalence in 2020 by age groups and sex (the whole of Japan). Arithmetic mean (95% uncertainty interval).

| Ages and sexes            | Hypertension        | Hyperlipidemia      | Diabetes             | Mental disorders     |
|---------------------------|---------------------|---------------------|----------------------|----------------------|
| Males and females (0–74)  | 0.006 (0.003–0.009) | 0.008 (0.002–0.015) | 0.003 (0.001–0.004)  | 0.003 (0.003–0.004)  |
| Males and females (0–39)  | 0.001 (0.001–0.001) | 0.003 (0.000–0.005) | 0.000 (0.000–0.001)  | 0.003 (0.002–0.004)  |
| Males and females (40–74) | 0.014 (0.007–0.021) | 0.017 (0.004–0.030) | 0.006 (0.001–0.010)  | 0.003 (0.002–0.004)  |
| Males (0–74)              | 0.007 (0.003–0.010) | 0.010 (0.003–0.017) | 0.003 (0.001–0.005)  | 0.003 (0.002–0.004)  |
| Males (0–39)              | 0.001 (0.001–0.002) | 0.004 (0.000–0.007) | 0.001 (0.001–0.001)  | 0.004 (0.003–0.004)  |
| Males (40–74)             | 0.015 (0.006–0.024) | 0.019 (0.007–0.031) | 0.007 (0.002–0.012)  | 0.003 (0.000–0.005)  |
| Males (0–19)              | 0.000 (0.000–0.000) | 0.000 (0.000–0.001) | 0.000 (0.000–0.000)  | 0.000 (-0.001–0.001) |
| Males (20–39)             | 0.002 (0.002–0.003) | 0.007 (0.001–0.013) | 0.001 (0.001–0.002)  | 0.007 (0.005–0.008)  |
| Males (40–64)             | 0.016 (0.006–0.026) | 0.021 (0.008–0.035) | 0.008 (0.003–0.013)  | 0.003 (0.000–0.006)  |
| Males (65–74)             | 0.007 (0.001–0.014) | 0.011 (0.003–0.019) | 0.001 (-0.007–0.010) | 0.001 (-0.001–0.003) |
| Females (0–74)            | 0.006 (0.004–0.008) | 0.007 (0.001–0.012) | 0.002 (0.000–0.003)  | 0.003 (0.002–0.004)  |
| Females (0–39)            | 0.001 (0.000–0.001) | 0.001 (0.000–0.003) | 0.000 (0.000–0.001)  | 0.003 (0.002–0.004)  |
| Females (40–74)           | 0.013 (0.009–0.017) | 0.015 (0.003–0.027) | 0.004 (0.001–0.007)  | 0.003 (0.002–0.005)  |
| Females (0–19)            | 0.000 (0.000–0.000) | 0.000 (0.000–0.000) | 0.000 (0.000–0.000)  | 0.000 (0.000–0.001)  |
| Females (20–39)           | 0.001 (0.000–0.002) | 0.002 (0.000–0.005) | 0.001 (0.000–0.001)  | 0.005 (0.003–0.006)  |
| Females (40–64)           | 0.012 (0.006–0.018) | 0.015 (0.002–0.027) | 0.005 (0.001–0.009)  | 0.003 (0.002–0.004)  |
| Females (65–74)           | 0.020 (0.006–0.034) | 0.016 (0.001–0.031) | 0.002 (-0.005–0.008) | 0.004 (0.001–0.007)  |

Table S8. Correlations between population density or COVID-19 infection rate and ratio of observed to estimated age-adjusted prevalence of mental disorders in 2020 among 47 prefectures (males, 0–39 years).  $\rho$ : Spearman’s rank correlation coefficient (95% uncertainty interval).

|                         | Hypertension          | Hyperlipidemia        | Diabetes              | Mental disorders      |
|-------------------------|-----------------------|-----------------------|-----------------------|-----------------------|
| Population density      | -0.110 (-0.392–0.191) | -0.021 (-0.314–0.276) | 0.031 (-0.266–0.323)  | -0.374 (-0.603–0.088) |
| COVID-19 Infection rate | -0.168 (-0.441–0.134) | -0.075 (-0.362–0.225) | -0.145 (-0.422–0.157) | -0.376 (-0.604–0.091) |

Table S9. Correlations between population density or COVID-19 infection rate and difference between observed and estimated age-adjusted prevalence of mental disorders in 2020 among 47 prefectures (males, 0–39 years).  $\rho$ : Spearman’s rank correlation coefficient (95% uncertainty interval).

|                         | Hypertension          | Hyperlipidemia        | Diabetes              | Mental disorders      |
|-------------------------|-----------------------|-----------------------|-----------------------|-----------------------|
| Population density      | -0.033 (-0.325–0.265) | 0.007 (-0.289–0.301)  | 0.044 (-0.255–0.335)  | -0.355 (-0.589–0.067) |
| COVID-19 Infection rate | -0.122 (-0.402–0.180) | -0.054 (-0.344–0.245) | -0.137 (-0.416–0.164) | -0.344 (-0.580–0.055) |
